# 1 **Discriminating bacterial phenotypes at the population and single-cell level:** 2 **a comparison of flow cytometry and Raman spectroscopy fingerprinting**

3

## 4 **Authors:**

5 Cristina García-Timmermans<sup>a\*</sup>, Peter Rubbens<sup>b\*</sup>, Jasmine Heyse<sup>a</sup>, Frederiek-Maarten Kerckhof<sup>a</sup>,  
6 Ruben Props<sup>a</sup>, Andre G. Skirtach<sup>c</sup>, Willem Waegeman<sup>b</sup>, Nico Boon<sup>a</sup>

7 <sup>a</sup>*CMET, Center for Microbial Technology and Ecology, Ghent University, Gent, Belgium*

8 <sup>b</sup>*KERMIT, Department of Data Analysis and Mathematical Modelling, Ghent University, Gent, Belgium*

9 <sup>c</sup>*Nano-BioTechnology group, Department of Biotechnology, Ghent University, Gent, Belgium*

10 \*These authors contributed equally to the manuscript

11 Corresponding authors: E-mail: [Nico.Boon@UGent.be](mailto:Nico.Boon@UGent.be)

## 12 **Abstract:**

### 13 **Background:**

14 Investigating phenotypic heterogeneity can help to better understand and manage microbial  
15 communities. However, characterizing phenotypic heterogeneity remains a challenge, as there  
16 is no standardized analysis framework. Several optical tools are available, such as flow  
17 cytometry and Raman spectroscopy, which describe properties of the individual cell.

### 18 **Results:**

19 In this work, we compare Raman spectroscopy and flow cytometry to study phenotypic  
20 heterogeneity in bacterial populations. The growth stages of three replicate *E. coli* populations  
21 were characterized using both technologies. . Our findings show that flow cytometry detects  
22 and quantifies shifts in phenotypic heterogeneity at the population level due to its high-  
23 throughput nature. Raman spectroscopy, on the other hand, offers a much higher resolution  
24 at the single-cell level (i.e. more biochemical information is recorded). Therefore, it is capable  
25 of identifying distinct phenotypic populations in an automated way when coupled with analyses  
26 tailored towards single-cell data. In addition, it provides information about biomolecules that  
27 are present, which can be linked to cell functionality.

### 28 **Conclusions:**

29 We propose a workflow to distinguish between bacterial phenotypic populations using Raman  
30 spectroscopy and validated this approach with an external dataset. We recommend to apply  
31 flow cytometry to quantify phenotypic heterogeneity at the population level, and Raman  
32 spectroscopy to perform a more in-depth analysis of heterogeneity at the single-cell level.

33 **Keywords:**

34 *E. coli*; Flow cytometry; phenotypic heterogeneity; Raman spectroscopy; single-cell  
35 technology; microbial ecology; growth phase

## 36 Background

37 Single-cell phenotypic differences arise even in genetically identical cultures (Govers et al.  
38 2017). A definition of a phenotypic population is an observed cellular state within a given  
39 genetic and environmental background. It arises due to epigenetic variations, stochastic gene  
40 expression, cellular age or oscillations such as the cell cycle. This is one of the strategies that  
41 bacteria use to adapt to a changing environment, as well as to divide the labour within the  
42 community (Avery 2006; Ackermann 2015).

43 Phenotypic heterogeneity in laboratory cultures is well-documented. For example, it has been  
44 studied in bacterial subpopulations that could tolerate antibiotics (known as 'persisters') (Dhar  
45 and McKinney 2007), in the production of cytotoxin K in *Bacillus cereus* (Ceuppens, Boon, and  
46 Uyttendaele 2013) or in the differential expression of flagellin in *Salmonella typhimurium*  
47 (Stewart et al. 2011). The challenge remains to find tools to measure and quantify this  
48 heterogeneity (i.e. phenotypic populations), in order to be able to link heterogeneity with  
49 bacterial functionality. This would allow to manage - and potentially steer – microbial  
50 communities in order to optimize bioprocesses.

51 Several tools are available for single-cell phenotyping (Davis and Isberg 2016). Imaging  
52 techniques are popular, but they require tagged bacterial cells or a probe to visualize the  
53 bacteria or the molecule of interest (Taniguchi et al. 2010; Anetzberger, Schell, and Jung  
54 2012), making them less suitable to study environmental communities. There are other  
55 techniques that do not require a probe, such as intrinsic fluorescence (Georgakoudi et al. 2007)  
56 or the detection of autofluorescent NAD(P)H (Bhattacharjee et al. 2017). However, the amount  
57 of information that can be gathered is limited compared to other techniques, such as  
58 transcriptomics, flow cytometry or spectroscopy techniques. Single-cell transcriptomics are  
59 also an option for bacterial phenotyping, but a few hundred cells are needed and only about  
60 15 - 25% of the expressed mRNAs can be detected (Tang, Lao, and Surani 2011). This

61 analysis requires for bacteria to be lysed, and it was found in *E. coli* that a single cells' protein  
62 and mRNA copy numbers are uncorrelated for any given gene (Taniguchi et al. 2010).

63 A more high-throughput option for single-cell analysis is flow cytometry, which can measure  
64 thousands of bacterial cells per second. Individual cells pass through a laser, after which  
65 detectors collect information on the scattered laser light (forward scatter, FSC, and side scatter,  
66 SSC) and on fluorescent emissions of specific probes (Davey and Kell, 1996). To detect  
67 bacteria, general nucleic acid stains (such as SYBR Green I or DAPI) can be used (Koch et al.  
68 2018). This technique allows to quantify cells, and also to identify different phenotypes in  
69 bacterial populations. For example, this technique allowed Sanchez-Romero and Casadesus  
70 (2014) to find a differential expression of a GFP-tagged gene related to antibiotic resistance in  
71 a *Salmonella enterica* population, and Cronin and Wilkinson (2008) to detect a heterogeneous  
72 response of *Bacillus cereus* endospores to different heat treatments. Furthermore, the  
73 information derived from the FCM measurements can be transformed into a fingerprint, and  
74 used to calculate inter- and intra-species variations in bacterial populations (De Roy et al. 2012;  
75 Props et al. 2016; Koch et al. 2014). Flow cytometry can also be used for bioprocess  
76 monitoring, as it allows to quantify the number of cells present in a reactor, their viability and  
77 activity, as well as their membrane potential over time (Díaz et al. 2010). When this technique  
78 is coupled to cell sorting (also known as FACS, or FCM Activated Cell Sorting), a follow-up  
79 analysis on the subpopulations can be made. For example, by doing a proteomic analysis to  
80 link these phenotypes to a certain functionality (Jahn et al., 2013), to further culture the cells,  
81 or by doing single-cell microscopy analysis (Nebe-von-Caron et al., 2000).

82 Raman spectroscopy is another single-cell technology that has been proposed to study  
83 phenotypic heterogeneity. It does not require labelling and is non-destructive. The laser excites  
84 individual cells, which leads to inelastic scattering, which in turn is collected in the form of  
85 Raman spectra. It is less throughput compared to flow cytometry: even when enhancing the  
86 signal with metals (known as Surfaced-Enhanced Raman Spectroscopy or SERS), each cell  
87 takes 1-3 seconds to measure (Liu et al. 2016). The resulting spectrum contains biochemical

88 information of the molecules that are present in the cell – e.g. lipids, carbohydrates, nucleic  
89 acids and proteins- and can be used to classify bacteria according to phylogeny (Goodacre et  
90 al., 1998). This information can be quantitative if an internal standard for the molecule(s) of  
91 interest is made -for example, (Cowcher, Xu, and Goodacre 2013) quantified the dipicolinate  
92 (DPA) biomarker for *Bacillus* spores; or (Samek et al. 2016) quantified polyhydroxyalkanoates  
93 produced by *Cupriavidus necator* H16)-. Raman spectroscopy can also be linked to cell sorting  
94 -known as RACS or Raman Activated Cell sorting- to further study phenotypes (Zhang 2015a).  
95 Raman spectroscopy can be used for the monitoring of bioprocesses, as it can measure over  
96 time compounds present in the supernatant such as glucose, protein production or others (Lee  
97 et al. 2004), as well as some Raman reactive compounds present in the bacteria, such as  
98 chlorophylls, carotenoids and other pigments (Jehlička, Edwards, and Oren 2014). Although  
99 this technique is used for bacterial identification (Huang et al., 2010; Almarashi et al. 2012;  
100 Strola et al. 2014; Pahlow et al. 2015), the study of phenotypic heterogeneity by Raman  
101 spectroscopy bacterial fingerprint remains relatively little explored.

102 Both flow cytometry and Raman spectroscopy give rise to data that need specific pre-  
103 processing and analysis (O'Neill et al. 2013; Saeys, Gassen, and Lambrecht 2016; García-  
104 Timermans et al. 2018; Ryabchykov, Guo, and Bocklitz 2018). While microbial flow cytometry  
105 is rather limited in its phenotypic resolution (i.e., only a few properties are measured per cell),  
106 Raman spectroscopy characterizes many more biochemical properties of bacterial cells. It  
107 therefore requires analysis of high-dimensional data, which can be challenging, but it allows to  
108 characterize phenotypic heterogeneity at a much higher resolution.

109 In this work, we analysed bacterial cells from nine phenotypic populations –with a different  
110 growth stage and/or from a different replicate- using flow cytometry and Raman spectroscopy.  
111 We demonstrate how these populations can be automatically retrieved using data-specific  
112 algorithms. We also demonstrate how metabolic inference can be performed based on Raman  
113 spectroscopy in a data-driven way. Finally, the advantages and disadvantages of these tools

114 for microbial phenotyping are discussed. We will motivate that, in its current form, microbial  
115 flow cytometry can be used to quantify phenotypic heterogeneity and describe community-  
116 level dynamics, while Raman spectroscopy can be applied to describe single-cell  
117 heterogeneity and possibly identify separated phenotypic populations. We include a  
118 recommendation for microbiologists on how to employ Raman spectroscopy and flow  
119 cytometry in future phenotyping studies.

120

121

## 122 Results

123 Throughout this paper, we define a 'phenotypic population' as a group of bacteria grown under  
124 the same environmental conditions (i.e. cells from the same biological replicate at a certain  
125 growth stage). This population will share morphological and/or metabolic traits that can be  
126 detected by flow cytometry and Raman spectroscopy. Samples of *E. coli* DSM 2092 were  
127 measured in the lag, log and stationary phase. For every condition, triplicates of the cell culture  
128 were made. Thus, we expected to retrieve 9 phenotypic populations. As it will be argued in the  
129 discussion, this is not to say that there might not be other subpopulations in each of these  
130 'phenotypic populations'.

### 131 Flow cytometry

132 Three biological replicates of *Escherichia coli* DSM 2092 were measured in the lag, log and  
133 stationary phase through flow cytometry (Fig. S1). Data was analysed at two levels: (a) the  
134 single-cell level (i.e., cells were analysed as individual instances) (b) the cell population level  
135 (i.e., cytometric fingerprints were constructed to describe population dynamics) (Fig. 1). t-  
136 distributed stochastic neighbourhood embedding (t-SNE) and principal component analysis  
137 (PCA) were used to visualize the data at the single-cell level (Fig. 1a-d, Fig. S3). Principal  
138 coordinate analysis (PCoA) was applied to visualize the differences of the phenotypic  
139 populations based on Bray-Curtis dissimilarities (Fig. 1f). As a validation, t-SNE was performed  
140 on the population level as well (Fig. 1e).

141

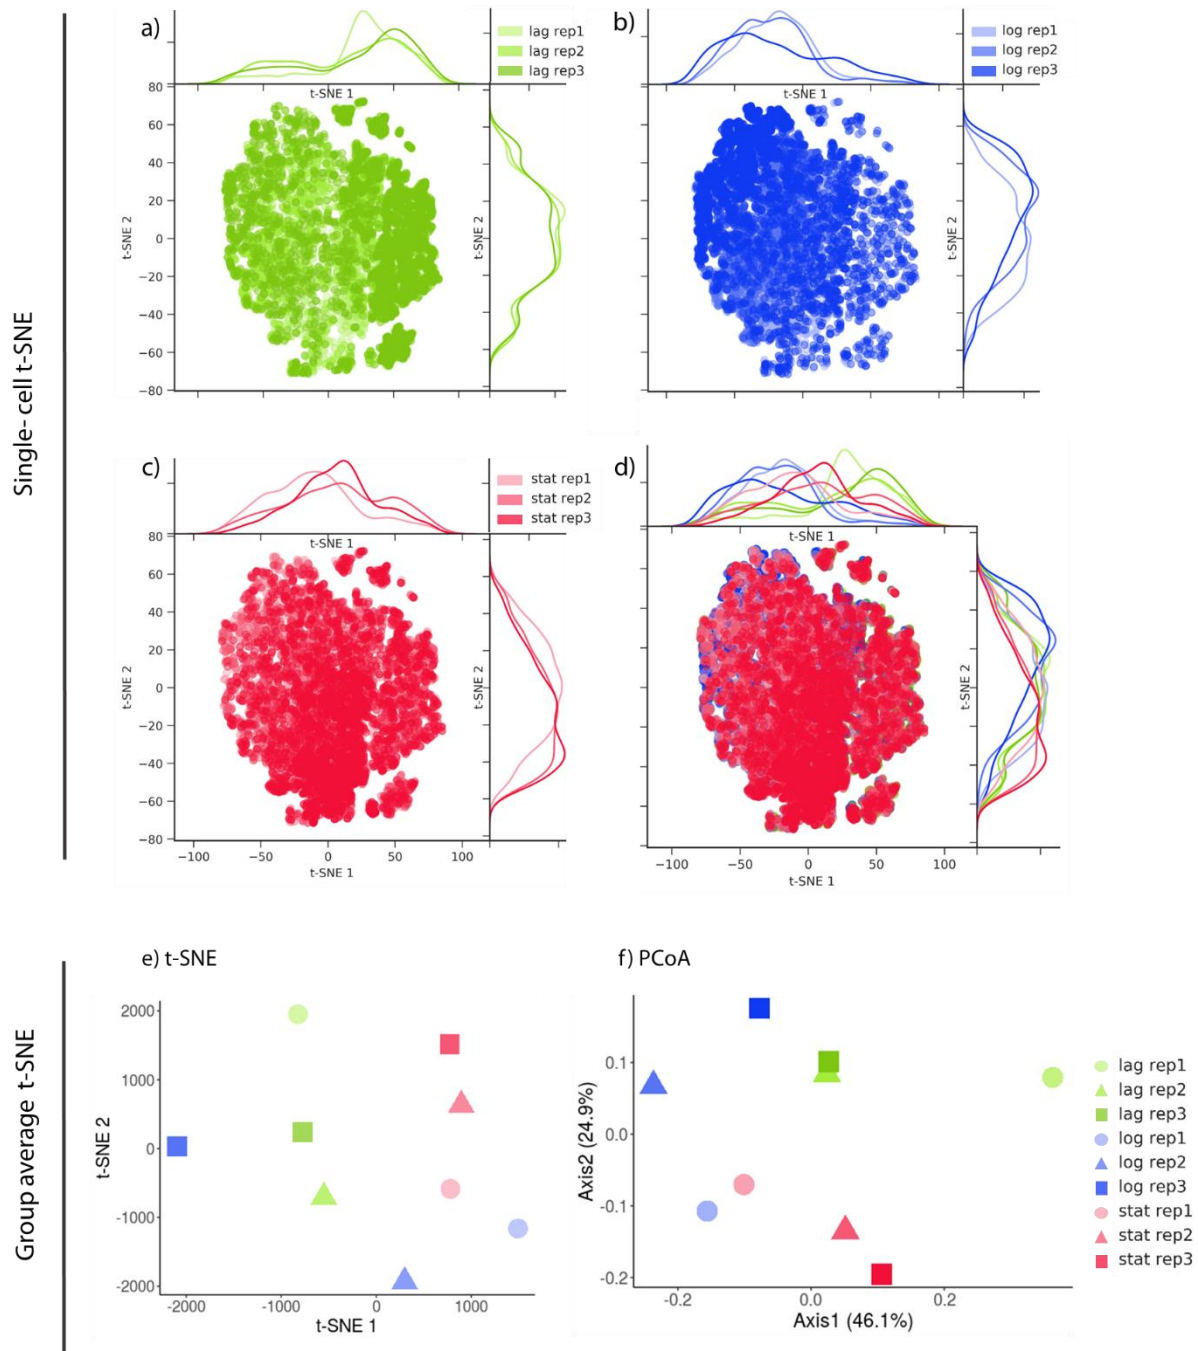

142

143 Fig. 1: *E. coli* measured with flow cytometry and analyzed at the single cell level (a-d) and population level (e and  
144 f). t-SNE was performed on the aggregation of all samples (d), and visualized separately for each growth phase,  
145 to allow for easier interpretation (a-c). Distributions on the side represent the t-SNE distributions separately  
146 visualised for each growth phase/replicate to allow for easier interpretation. (e-f) Visualization of cytometric  
147 fingerprints at the sample level, using t-SNE (e) or PCoA (f).

148 No separated subpopulations could be distinguished based on cytometric single-cell data  
149 (Fig. 1a-d). Yet, shifts in the distribution of cells were clear, both between different growth  
150 phases and replicates, as can be seen from the marginal distributions. Therefore, by creating  
151 cytometric fingerprints, which are vectorizations of the cell counts per bin, these differences



152 could be quantified and visualized at the community level (Fig. 1e-f). Differences between  
153 fingerprints were calculated using the Bray-Curtis dissimilarity. Average dissimilarities per  
154 growth phase and replicate were summarized in Table 1. The average Bray-Curtis dissimilarity  
155 between samples within the same growth phase is smaller compared to samples that  
156 originated from the same replicate (Table 1). The lag phase for replicate 1 was quite different  
157 from the other samples (Fig. 1f).

158 Table 1: Average Bray-Curtis distance between the samples based on their growth phase or their replicate. A.U.=  
159 arbitrary units.

|                  | <b>Average distance between samples (A.U., n=3)</b> | <b>Standard deviation (n=3)</b> |
|------------------|-----------------------------------------------------|---------------------------------|
| Lag phase        | 0.33                                                | 0.08                            |
| Log phase        | 0.33                                                | 0.06                            |
| Stationary phase | 0.21                                                | 0.06                            |
| Replicate 1      | 0.41                                                | 0.18                            |
| Replicate 2      | 0.35                                                | 0.04                            |
| Replicate 3      | 0.35                                                | 0.07                            |

160

## 161 Raman spectroscopy – clustering results

162 The samples used for flow cytometric analysis were fixed and analysed using label-free Raman  
163 spectroscopy following the protocol from (García-Timmermans et al. 2018). To identify  
164 phenotypic populations, two clustering methods were used. First, using an agglomerative  
165 hierarchical clustering approach and secondly, using the PhenoGraph algorithm - a tool  
166 developed for the analysis of high-dimensional cytometry data. To determine the hierarchical  
167 clustering, the spectral contrast angle between samples was calculated (a measure of the  
168 spectra similarity). Then, phenotypic populations can be delineated by setting a threshold upon  
169 inspection of the resulting dendrogram after hierarchical clustering (Fig. 2). On the other hand,  
170 PhenoGraph makes use of  $k$ -nearest-neighbours clustering, in order to determine groups of  
171 similar cells, and as such, phenotypic populations. In other words,  $k$  expresses the amount of  
172 local information that is included when cells are grouped according to similar spectra.  $k$  will

173 therefore, in a similar way as the threshold used in hierarchical clustering, impact the number  
174 of phenotypic populations that are defined (Fig. 3).

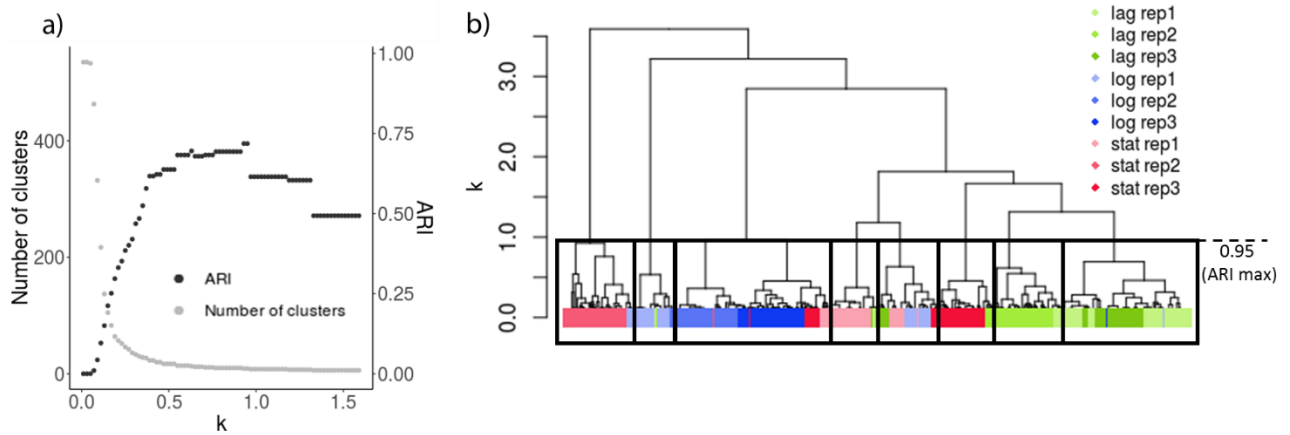

175

176 Fig. 2: Hierarchical clustering of Raman spectra derived from the *E. coli* culture. Cells were measured in the log,  
177 lag and stationary phase using Raman spectroscopy. (a) Left axis, grey: Visualization of the number of clusters we  
178 can obtain by cutting the cluster at different heights ( $k$ ). Right axis, black: ARI, which quantifies how many cells are  
179 identified as the expected phenotypic population when clusters are made at different levels. (b) Dendrogram  
180 representing the distance (calculated as the spectral contrast angle) amongst the Raman spectra. The black boxes  
181 divided the phenotypic populations when the dendrogram is cut at  $k=0.9$ . This is the maximum adjusted Rand index  
182 (ARI), as calculated in Fig. 2a.

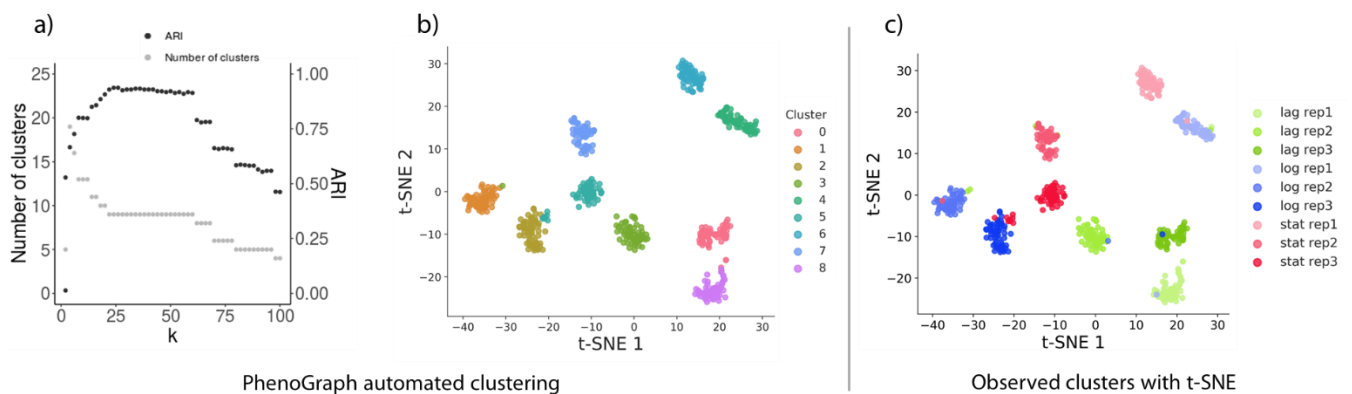

183

184 Fig. 3: PhenoGraph clustering of Raman spectra derived from the *E. coli* culture. a) Influence of hyperparameter  $k$   
185 on the automated identification of phenotypic populations. Left axis, grey: Visualization of the number of clusters in  
186 function of  $k$ . Right axis, black: Adjusted Rand index (ARI), which quantifies how many cells are identified as the  
187 expected phenotypic population when clusters are made at different levels ( $k$ ). b) t-SNE visualization, colored

188 according to PhenoGraph clustering with optimal ARI ( $k=22$ ). c) t-SNE results colored according to growth phases  
189 and replicates.

190 The adjusted Rand index (ARI) was used to quantify similarity between the clusters that were  
191 determined by hierarchical clustering and Phenograph and the known phenotypic populations  
192 (i.e. growth phase and replicate). An ARI of 1 indicates perfect grouping of the data. The  
193 PhenoGraph algorithm resulted in a higher ARI as opposed to hierarchical clustering based on  
194 the spectral contrast angle (Fig. 2a vs. Fig. 3a). Inspecting the PhenoGraph results, there is a  
195 stable region for  $k$  that retrieves clustering according to both growth phase and replicate (i.e.,  
196 nine clusters were found for  $k = 20, \dots, 60$ ). A value of  $k = 24$  or  $26$  gave rise to an optimal  
197 clustering (Fig. 3a). Smaller  $k$  allowed to inspect phenotypic populations at smaller scales and  
198 investigate the heterogeneity accordingly. See for example the clustering results for  $k = 15$ ,  
199 which resulted in eleven different groups of cells (Fig. S5). Additional clusters that emerged  
200 were the result of splitting two clusters into two smaller ones. Likewise, larger  $k$  will result in  
201 larger clusters. For example, for  $k = 100$ , data is grouped in five clusters (Fig. S5). Structure in  
202 the data is retained, as clusters are merged either according to growth phase (clusters 0, 2  
203 and 3) or replicate (cluster 1).

204 Often a single-cell was classified as the expected replicate, but in another growth phase (Fig.  
205 3c). The samples in the lag phase seem to have a single-cell that is already in the log phase,  
206 and in the cultures in the log phase, we find a cell in the stationary phase (in replicate 3) and  
207 one cell in the lag and in the stationary phase (in replicates 1 and 2). It is also worth noting  
208 that some cells from replicate three seem to be between the log and the stationary phase.

## 209 Raman spectroscopy – tentative region assignment

210 The Boruta algorithm, a variable selection algorithm based on Random Forests, was used to  
211 associate the most distinctive regions in the Raman spectrum with cluster assignments  
212 according to the hierarchical clustering and PhenoGraph algorithm. The cluster labels that  
213 resulted in an optimal ARI were used. Regions were linked with different molecules based on

214 a recent summary from Wang et al., 2016. In this way, metabolic associations could be inferred  
 215 that contained predictive power as a function of different phenotypic populations (Table 2).

216 Table 2: Tentative assignment of Raman spectra using the Boruta algorithm based on phenotypic identification  
 217 using hierarchical clustering and PhenoGraph. The 10 highest ranked areas are shown. When there is no known  
 218 compound in the spectral region, either the closest compound or a blank is shown. A.U.=arbitrary units.

219

| Wavelength<br>(cm <sup>-1</sup> ) | Features importance                     |                                    | Tentative assignment                                                                                                                       |
|-----------------------------------|-----------------------------------------|------------------------------------|--------------------------------------------------------------------------------------------------------------------------------------------|
|                                   | PhenoGraph (k=22,<br>9 clusters) (A.U.) | hclust (h=1, 8<br>clusters) (A.U.) |                                                                                                                                            |
| 1042                              | 9.8                                     | 9.8                                | Carbohydrates, Proline (1043)                                                                                                              |
| 971                               | 9.5                                     | 9.7                                | v(C-C) wagging (971) // Phosphate monoester groups of phosphorylated proteins and cellular nucleic acids (970)                             |
| 945                               | 9                                       | 8.9                                | vs (CH <sub>3</sub> ) of proteins (α-helix) (951)                                                                                          |
| 1057                              | 8.9                                     | 8.8                                | Lipids (1057) // Carbohydrates (1030-1130)                                                                                                 |
| 1294                              | 8.5                                     | 8.5                                | CH <sub>2</sub> deformation (1295)                                                                                                         |
| 1050                              | 8.5                                     | 8.6                                | Nucleic acids, CO stretching; protein, C-N stretching, PHB (1054) // Carbohydrates (1030-1130)                                             |
| 1053                              | 8.4                                     | 8.4                                | Nucleic acid (1054) // Carbohydrates (1030-1130)                                                                                           |
| 1127                              | 8.3                                     | 8.4                                | v(C-N), protein (1127) // Carbohydrates (1030-1130)                                                                                        |
| 1046                              | 8.1                                     | 8.2                                | v <sub>3</sub> PO <sub>4</sub> <sup>3-</sup> (symmetric stretching vibration of v <sub>3</sub> PO <sub>4</sub> <sup>3-</sup> of HA) (1044) |
| 641                               | 8                                       | 7.9                                | C-C twisting of tyrosine (642)                                                                                                             |

220

221 To understand how the molecules in Table 1 vary from one group to another, the distribution  
 222 of intensities of these Raman regions was plotted for every growth phase (Fig. 4). A Wilcoxon  
 223 rank sum test with a Benjamini–Hochberg correction was performed for the ten highest ranked  
 224 variabls according to the Boruta algorithm (Fig. 4).

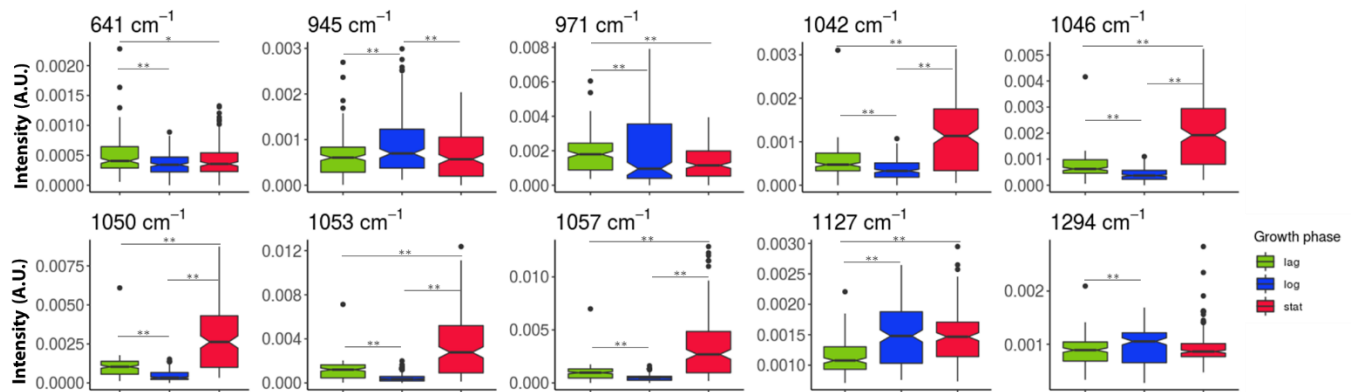

225

226 Fig. 4: Distribution of intensities of the most relevant regions associated with phenotypic populations according to  
227 the Boruta algorithm. Boxplots represent the growth phases (replicates were pooled together). Groups were made  
228 according to the growth phase: lag (green), logarithmic (blue) or stationary (red). For every spectral region, a  
229 Wilcoxon rank sum test was made, with a Benjamini-Hochberg correction (upon rejection of the null hypothesis).  
230 Groups with significantly different peaks are signalled with (\*) ( $p < 0.05$ ) or (\*\*) ( $p < 0.01$ ).

231 To better understand what regions of the Raman spectra (and therefore, what biomolecules)  
232 were making these phenotypic populations different, we defined phenotypic populations at  
233 different levels (changing the  $k$  parameter in the PhenoGraph algorithm) and then used the  
234 Boruta algorithm to identify the most relevant regions.

235 When more phenotypic populations were distinguished (i.e. setting the value of  $k$  lower) more  
236 regions in the Raman spectrum were associated with differences in phenotypic populations.  
237 As shown in Figure 5, to find the phenotypic populations with different growth phases, 59% of  
238 the regions are included (green); to find the biological replicates, it is 67%; and to find both  
239 categories, 77%. Although this result was expected, a large number of Raman regions (48%)  
240 were relevant for all levels of classification.

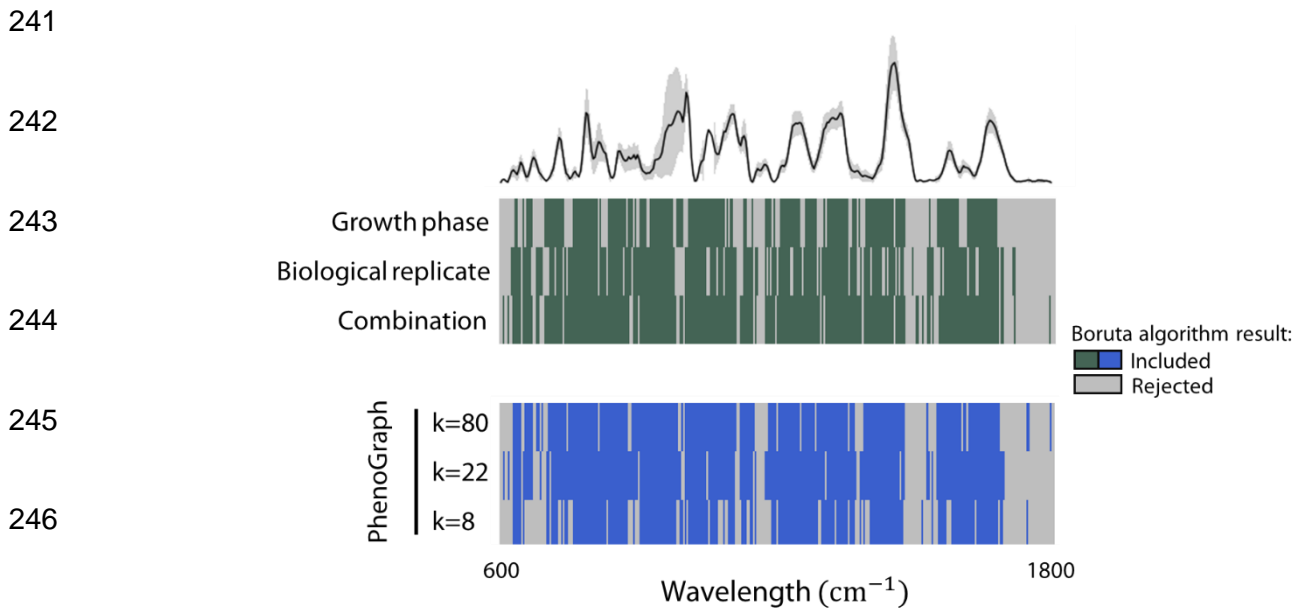

248 Fig. 5: Spectral regions relevant for phenotypic classification at different levels, according to the Boruta algorithm.  
249 The top heatmap shows the results for the growth phase and replicates. At the bottom, the results for PhenoGraph  
250 with the clustering hyperparameter  $k$  as 80, 22 or 8 are shown. In green and blue, spectral regions confirmed by  
251 the Boruta algorithm as relevant, in grey the rejected. The average of all spectra is also plotted; the grey areas in  
252 the average spectrum correspond to the standard deviation.

### 253 Validation of single-cell analysis of Raman spectra

254 To validate our workflow to analyse microbial single-cell Raman data, the dataset from Teng  
255 et al., 2016 was used. In this work, *E. coli* was exposed to different chemicals (ethanol,  
256 antibiotics, n-butanol or heavy metals) and the spectra of the bacteria were measured at  
257 several time points after the treatment (5, 10, 20, 30 and 60 min, 3h and 5h). Three replicates  
258 of the cell culture were made for each treatment. Here we show the results for cells treated  
259 with ethanol (Fig. 6), representative for what is observed in the other groups (Fig. S6). t-SNE  
260 was able to visualize groups of bacteria that received different treatments at different points in  
261 time. Furthermore, two subpopulations are seen in every group. They correspond to the  
262 replicates, where two replicate samples are separated, and the third replicate is either assigned  
263 to one of the two or divided amongst the two subpopulations. The optimal ARI is lower than  
264 the one reported for our own work, but still considerably higher than zero. This means that

265 although the clusters assigned according to PhenoGraph have a better match with the  
266 treatments induced in our own dataset compared to this one, the clustering is still meaningful.

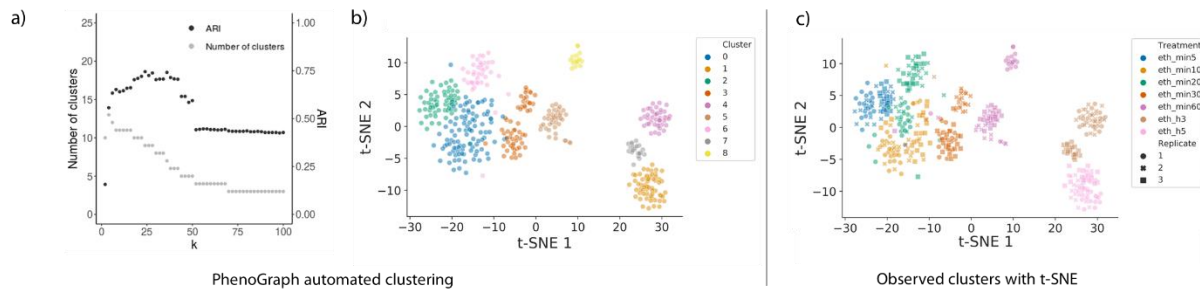

267

268 Fig. 6: External dataset clustered using t-SNE. *E.coli* treated with ethanol and measured at time points 5, 10, 20,  
269 30 and 60 min, 3h and 5h. (a) Influence of hyperparameter  $k$  on the automated identification of clusters. Left axis,  
270 grey: Visualization of the number of clusters in function of  $k$ . Right axis, black: Adjusted Rand index (ARI), which  
271 quantifies how many cells are identified as the expected phenotype when clusters are made at different levels ( $k$ ).  
272 (b) Using the maximum ARI, samples were automatically clustered using PhenoGraph. (c) t-SNE was performed  
273 on the data set and samples were labelled according to their treatment. The shapes represent the sample replicate.

274

275

## 276 Discussion

### 277 Flow cytometry quantifies population shifts

278 When using single-cell data from flow cytometry, the different phenotypic populations  
279 overlapped and did not form separate clusters, as shown by both the t-distributed stochastic  
280 neighbourhood embedding (t-SNE) and the principal component analysis (PCA) (Fig. 1a, SI  
281 Fig. 2). However, in the t-SNE plot, a consistent shift in the cells distribution could be observed  
282 in response to the different growth phases (Fig. 1a-d). In other words, gradual shifts in the  
283 structure of the phenotypic population, i.e. the phenotypic heterogeneity, could still be  
284 detected, although individual cells could not be separated according to growth phase or  
285 replicate. As flow cytometry is capable of rapidly measuring a large amount of cells, the  
286 differences in phenotypic heterogeneity at the population level could be described by  
287 constructing cytometric fingerprints (Koch et al. 2014; Props et al. 2016). The Bray-Curtis  
288 dissimilarity was used to quantify these differences at a sample level. The average Bray-Curtis  
289 dissimilarity showed that the effect of the replicates exceeded the effect of the growth phase  
290 (except for the lag phase). This implies that the differences of *E. coli* cells in different growth  
291 stages are comparable or smaller to those the differences amongst replicates. The results from  
292 (Teng et al. 2016) analysed in Figure 6 leads us to hypothesize that when the community is  
293 steered with a stressor, the effect in the fingerprint is bigger, making the replicate effect smaller.

294 Flow cytometry is a high-throughput technique, able to rapidly measure hundreds to thousands  
295 of individual cells. By applying fingerprinting approaches to cytometry data, differences  
296 between microbial populations at the population level can be assessed and quantified. In this  
297 work, gradual shifts could be detected in the flow cytometric data at the level of individual cells,  
298 while at the sample-level (i.e. the population distribution level), differences between  
299 communities could be quantified (e.g., using the Bray-Curtis dissimilarity) and separated  
300 accordingly. In other words, while current resolution at the single-cell level appears to be limited  
301 for microbial flow cytometry, due to its high-throughput nature, its power lies in the possibility  
302 to characterize and phenotypic heterogeneity at the population level and quantify shifts in



303 phenotypic heterogeneity. In this work, gradual shifts could be detected in the flow cytometric  
304 data at the level of individual cells, while at the sample-level (i.e. the population distribution  
305 level), differences between communities could be quantified (e.g., using the Bray-Curtis  
306 dissimilarity) and separated accordingly.

307 It is worth noting that in this work the effect of using additional or more specific labels for  
308 cytometric analysis has not been explored, which might improve the resolution. It is possible  
309 to add stains to target specific substrates (see the review of Léonard et al. (2016) on the use  
310 of individual and double stains, and an example of a three-color analysis by (Barbesti et al.  
311 2000)), but the number of markers describing microbial cells using flow cytometry will never  
312 be of the same order as that of Raman spectroscopy. In eukaryotic flow cytometry, where the  
313 tagging of specific antibodies is much more feasible, 19-parameter flow cytometry is routinely  
314 used (17 fluorescence and two scatters) (Perfetto, Chattopadhyay, and Roederer 2004) and  
315 30-parameter flow cytometry has just recently been published (Mair and Prlic 2018). However,  
316 the dimensionality of cytometry data in these settings is still much lower than the number of  
317 variables derived from Raman spectroscopy. Even in the best-case scenario, the  
318 dimensionality of flow cytometry data cannot get close to the number of parameters that  
319 Raman spectroscopy exhibits. On the other hand, depending on the research question, a high-  
320 dimensional tool might not be needed. For example, biomolecules that are associated with a  
321 phenotypic population might be known, and there could be a dye available to highlight these  
322 molecules. In this case, flow cytometry could be more relevant for phenotyping than Raman  
323 spectroscopy, provided the proper parameters are chosen to differentiate among treatments.  
324 In this work, we compared phenotypic populations that are not differentiated by (a) specific,  
325 known molecule(s) but used a general marker to characterize the DNA content. This explains  
326 why flow cytometry did not have enough resolution to differentiate the phenotypic populations.

327 **Raman spectroscopy detects phenotypic populations at the single-cell level**

328 Raman spectroscopy is lower throughput for single-cell analysis when compared to flow  
329 cytometry, but it is able to retrieve much more information per cell. Its resolution is enough to

330 conduct research at the single-cell level. The study of bacterial phenotypes using Raman  
331 spectroscopy has been done by other groups: to identify different growth stages in *L.casei*  
332 (Ren et al., 2017), stress-induced phenotypic populations (Teng et al. 2016), bacterial  
333 phenotypes with different antibiotic responses (REFAtha 2014) or with different antibiotic  
334 susceptibility (Novelli-Rousseau et al. 2018). It has also been used to discriminate between  
335 different *Acinetobacter* (Maquelin et al. 2006) or different *E. coli* strains (Jarvis and Goodacre  
336 2004) amongst other examples. However, in these studies the expected phenotypes were  
337 known in advance. How to define what a phenotype is in a less-known system or a natural  
338 environment? In this work, we propose and validate the use of PhenoGraph –a tool derived  
339 from t-SNE and developed for the analysis of flow cytometry data- to do an automated  
340 identification of bacterial phenotypes.

341 The PhenoGraph algorithm was originally developed for mass cytometry data (Levine et al.  
342 2015), a variation of flow cytometry which makes use of heavy metal ion tags instead of  
343 fluorochromes, resulting in more observed variables but at a lower acquisition speed (Spitzer  
344 and Nolan 2016). PhenoGraph was demonstrated to be highly effective for clustering purposes  
345 of single-cell Raman data, and returned a higher clustering performance compared to a more  
346 traditional hierarchical clustering approach. However, hierarchical clustering allows to inspect  
347 which cells are most similar to each other, a characteristic which is lost when using  
348 PhenoGraph. Therefore we want to reiterate that, as proposed by (Andrews and Hemberg  
349 2018) for the analysis of single-cell RNA sequencing data, "[I]ikewise, no computational  
350 methods for dimensionality reduction, feature selection and unsupervised clustering will be  
351 optimal in all situations". The algorithm of choice depends on the needs of the user. If a  
352 researcher wants to visualize subpopulations, we recommend the use of t-SNE. If identification  
353 of phenotypic populations is needed in an automated way, PhenoGraph is more appropriate.  
354 To assess which individual cells are phenotypically closest, hierarchical clustering can be  
355 used. Further investigation of the analysis of Raman data is needed, but investigating

356 additional algorithms specifically developed for high-dimensional single-cell data might further  
357 support the impact of the use of Raman spectroscopy.

358 To improve the analysis speed of Raman spectroscopy, metallic substrates can enhance the  
359 signal (SERS), but also microfluidic chips (McIlvenna et al. 2016) or optical tweezers can be  
360 used (Xie, Chen, and Li 2005). An advantage of Raman spectroscopy is that it can be applied  
361 without the use of labels. This allows to analyse the biochemistry of samples even without  
362 knowing their nature. Raman spectroscopy also presents disadvantages. For instance, the  
363 Raman signals of certain compounds can be quite weak, making them difficult to detect or  
364 undetectable. The Raman signal of certain compounds can be composed of several peaks, or  
365 be unknown. Also, the background of samples can interfere with the Raman signal of bacteria.  
366 The equipment can be quite costly, depending on the type of Raman spectroscope.

367 Raman spectroscopy offers more parameters per cell compared to flow cytometry (hundreds  
368 versus typically three or four for microbial experiments). Thus, individual bacteria are described  
369 in a much larger multivariate space and can therefore be clustered into separate phenotypic  
370 populations. This explains why bacterial subpopulations can be visualized at the single-cell  
371 level using t-SNE (Fig. 3). The t-SNE results were confirmed with a PCA (Fig. S3).

372 The main downside of the use of label-free Raman spectroscopy is that the time of  
373 measurement is long: in this experiment, for single-cell label-free measurements, we used an  
374 acquisition time of 40 seconds per cell. Even when the acquisition time is lower –for instance,  
375 (Liu et al. 2016) reported a 1-3 seconds acquisition time to detect antibiotic susceptibility using  
376 surface-enhanced Raman spectroscopic biomarkers- the speed of Raman spectroscopy  
377 cannot match the high-throughput nature of flow cytometry for single-cell analysis.

378 Raman spectroscopy allows to detect differences in biomolecules from one  
379 sample to another

380 Raman spectroscopy allows to detect biomolecules present in different phenotypic  
381 populations. Therefore, after automated identification of phenotypic populations, one can use

382 the phenotypic groups to perform a variable selection strategy to select important regions in a  
383 data-driven way. We illustrated this approach using the Boruta algorithm, which was recently  
384 evaluated as one of the state-of-the-art variable selection methods using Random Forests for  
385 omics datasets (Degenhardt, Seifert, and Szymczak 2017). We found that a majority of  
386 selected spectral regions were the same according to treatment and automated phenotypic  
387 population identification using PhenoGraph (Fig. 3). This information can be used to infer how  
388 phenotypic populations are different at the level of their metabolism. To do so, we have based  
389 ourselves on a recent literature survey summarizing associations between Raman regions and  
390 certain biological compounds (Wang et al. 2016). The ten most important regions in function  
391 of phenotypic identification are listed in Table 2, along with the distribution of their intensities  
392 (Fig. 4). These regions correspond to carbohydrates and nucleic acids, as well as some  
393 unknown regions. An increase in the carbohydrate band (peaks 1042, 1046, 1050, 1057 cm-  
394 1) was observed for the stationary phase. The band at 1053 cm-1 could also be a nucleic acid  
395 peak, expected at 1054 cm-1. Nevertheless, these assignments for the Raman bands are  
396 tentative and based solely on a literature research, and thus proper validation of these results  
397 would have to be made in future experiments.

### 398 How to define a phenotypic population?

399 In this work, we have steered microbial communities towards a certain growth stage, expecting  
400 that they would express a certain phenotype that could be retrieved using flow cytometry and  
401 Raman spectroscopy. However, in each one of these isogenic populations there might be  
402 subpopulations, as can be seen in Figure 2b. We acknowledge the difficulty in defining what a  
403 phenotypic population is, and setting a threshold to determine when one phenotypic population  
404 ends and another begins.

405 A similar problem exists in the area of bacterial taxonomy, where the similarity of 16S  
406 sequences is compared. In this case, an arbitrary threshold is set (e.g., 95% similarity at the  
407 genus level, 98.56% at the species level) (Stackebrandt and Goebel 1994; Kim et al. 2014).  
408 As explained by Beye et al. (2018), this cut-off was meant to standardize the use of 16S rRNA

409 gene amplicon sequencing, but it had to evolve; i.e., the first threshold for the species level  
410 has changed from 97%, to 98.7%, to the current 98.65%. Even now, it is argued that these  
411 thresholds are not applicable to multiple genera (Mysara et al. 2017). In the case of phenotypic  
412 populations, we propose a definition based on their similarity (after setting a similarity  
413 threshold) and their ecology (their relationship with one another and with their environment).  
414 Quantifying their similarity can be done in a data-driven way, by means of for example  
415 clustering, at the resolution that is required for the specific research. This operational definition  
416 allows to define phenotypic populations depending on the research question, as long as  
417 researchers motivate and validate their choice. However, using this operational definition  
418 means that results cannot be compared across experiments or labs. This is why we highlight  
419 the need to find a more standard way to define 'basic phenotypic units', that would allow to  
420 measure phenotypic traits and determine if bacteria belong to the same phenotypic population.

421 We propose to use algorithms -such as hierarchical clustering, t-SNE or PhenoGraph, applied  
422 throughout this paper- to define, visualize and characterize phenotypic populations. t-SNE is a  
423 well-known technique to visualize high-dimensional single-cell data, being commonly applied  
424 to visualize for example cytometry and single-cell RNA sequencing data (Amir et al. 2013;  
425 Andrews and Hemberg 2018). Our results confirm that it can be used as an 'off-the-shelf'  
426 visualization method to detect phenotypic populations in Raman data when applied to  
427 microorganisms.

428 Bacteria were grown in 9 different conditions (three replicate cultures of three growth stage  
429 conditions) to steer the same *E. coli* population to a different morphological and/or metabolic  
430 state –to steer them into 9 phenotypic populations. While hierarchichal clustering was able to  
431 find eight of these phenotypic populations, PhenoGraph was able to retrieve all nine of them,  
432 resulting in a higher ARI as well.

433 t-SNE and PhenoGraph were also applied to an external dataset from Teng et al., 2016,  
434 consisting of *E. coli* that had been treated with different agents, and measured at several time

435 points. We showed that PhenoGraph was capable of differentiating the time points per  
436 treatment. Interestingly, two subpopulations were identified per treatment, although samples  
437 were measured in triplicate. These corresponded to two replicates, where the third was either  
438 assigned to one subpopulation or divided between both (Fig. 6, Fig. S6). Our group has  
439 previously shown how small technical variations can create subpopulations that have no  
440 biological meaning (García-Timmermans et al. 2018), which might explain these findings.

441 Each algorithm has its own advantages and disadvantages. t-SNE is a highly effective  
442 technique to visualize high-dimensional single-cell data, which we confirmed for the Raman  
443 analysis of microorganisms. However, automated clustering of the data is not possible using  
444 t-SNE without additional algorithms, such as PhenoGraph.

## 445 Conclusions

446 The results of this research suggest that:

- 447 - Flow cytometry is a more high-throughput technology than label-free Raman  
448 spectroscopy, but Raman describes bacterial cells in many more variables, without the  
449 need for staining.
- 450 - Flow cytometry can be applied to quantify differences in phenotypic heterogeneity at  
451 the population level, whereas Raman spectroscopy has sufficient resolving power to  
452 identify separated phenotypic populations at the single-cell level.
- 453 - Raman spectroscopy provides the possibility to infer which metabolic properties define  
454 different phenotypic populations, and potentially exploit this information for bioprocess  
455 monitoring.
- 456 - We propose a workflow to automatically identify bacterial phenotypes, based on  
457 Raman spectral data. We also recommend t-SNE to visualize Raman data.

458        -    From a broader perspective, one can motivate that phenotypic populations depend on  
459            a similarity threshold, which can be set in clustering algorithms, and on their ecological  
460            niche. We therefore suggest that researchers try to include validation controls in their  
461            experimental setup, in order to motivate the threshold of choice in the algorithm.

462

## 463 Materials & Methods

### 464 Cell culture

465 To determine the growth stages of the cell culture (lag, log and stationary phase), *Escherichia*  
466 *coli* DSM 2092 was grown in nutrient broth (NB, Oxoid, United Kingdom) at 28°C, 120 rpm  
467 shaking in three replicates. Cultures had an initial concentration of 10<sup>6</sup> cells/ml, measured with  
468 a BD Accuri C6 flow cytometer (BD Biosciences), following the protocol from Van Nevel 2013.  
469 The samples were incubated in the dark for 30 h at 28°C, during which optical density (OD,  $\lambda$   
470 = 620 nm) measurements were automatically collected each hour using a microtiter plate  
471 reader (Tecan Infinite M200 Pro; Tecan UK, Reading, United Kingdom). The growth phases  
472 were assigned after fitting the results with the function *SummarizeGrowth()* from the  
473 'Growthcurver v0.30' R package (Sprouffske and Wagner 2016). Cells were harvested 1h,  
474 7h30 and 24h after inoculation, corresponding accordingly to the lag, log and stationary phases  
475 of *E.coli* (see Fig. S1). Nutrient broth was included as a negative control.

### 476 Sample preparation

477 Samples were measured immediately in the flow cytometer after sampling. For Raman  
478 spectroscopy, samples were harvested and fixed in formaldehyde 4% (Sigma-Aldrich)  
479 dissolved in PBS (protocol from Bio-Techno Ltd., Belgium) following the protocol from (García-  
480 Timermans et al. 2018). First, 1mL of the cell suspension was centrifuged for 5 min at room  
481 temperature and 1,957 x *g*. For the samples in the lag phase, up to 10 mL were suspended  
482 until a pellet could be seen. The supernatant was discarded and cells were suspended in  
483 filtered and cold PBS (4°C). The samples were again centrifuged at 1,957 x *g* for 5 min at room  
484 temperature. The supernatant was discarded and the pellet was re-suspended in filtered  
485 formaldehyde 4%. The cells were allowed to fix for 1h at room temperature (21°C). Then, the  
486 samples were centrifuged at 1,957 x *g* for 5 min at room temperature and washed twice with  
487 cold PBS (4°C). Cells were stored at 4°C and analysed in the Raman spectroscopy within the  
488 week.



## 489 Flow cytometry

490 Fresh samples taken at the lag, log and stationary phase were diluted in filtered PBS and  
491 stained with SYBR Green I 1% (Thermo Fisher) during 13 min at 37°C. They were measured  
492 with the flow cytometer BD Accuri C6 (BD Biosciences). This resulted in a multivariate  
493 description of each cell by four fluorescence detectors (FL1: 533/30 nm, FL2: 585/40 nm, FL3:  
494 > 670 nm long pass, FL4: 675/25 nm), of which the FL1 detector was targeted by SYBR Green  
495 I, and two scatter detectors (forward scatter, FSC and side scatter, SSC). The channels FSC-  
496 H, SSC-H, FL1-H and FL3-H were used for data analysis.

## 497 Single-cell analysis

### 498 *t-distributed stochastic neighborhood embedding (t-SNE)*

499 t-SNE is a dimensionality reduction technique developed for the visualization of high-  
500 dimensional data (Van Der Maaten and Hinton 2008). The *TSNE()* function from the scikit-  
501 learn machine learning library was used (Pedregosa et al. 2011, v0.19.1). Principal component  
502 analysis was set as initialization method. TSNE was run with default settings unless reported  
503 otherwise. Data were first transformed by the function  $f(x) = \text{asinh}(x)$ , and next normalized so  
504 that each channel has a mean of zero and standard deviation of one.

### 505 *Principal component analysis (PCA)*

506 Flow cytometric single-cell data were analysed with the *PCA()* function from the scikit-learn  
507 machine learning library after normalization. Data were first transformed by the function  $f(x) =$   
508  $\text{asinh}(x)$ , and next normalized so that each channel has a mean of zero and standard deviation  
509 of one.

## 510 Community analysis

511 The PhenoFlow R package (Props et al., 2016) was used for the analysis. Four channels (FL1-  
512 H, FL3-H, FSC-H and SSC-H) were selected to derive a phenotypic fingerprint for each  
513 sample. Bacteria were gated to differentiate from background noise as shown in Fig. S2. As  
514 quality control, the stability of the FL1 signal over time was checked. A 128 x 128 binning grid

515 was constructed for each pairwise combination of these channels (resulting in 6 in total). Next,  
516 a bin a kernel density estimation was performed to determine the density per bin (with a  
517 Gaussian kernel density bandwidth of 0.01). Then, all bins are concatenated to a one-  
518 dimensional vector, representing the cytometric fingerprint. Data were normalizedtransformed  
519 usingby the function  $f(x) = \text{asinh}(x)$  transformation. At least 10.000 cells were measured per  
520 sample.

521  
522 *Principal component analysis (PCA) and principal component analysis (PCoA)*

523 The pulled information for every group was analysed with the function *fviz\_pca\_ind()* from the  
524 R package 'factoextra' (Kassambara and Mundt 2017).

525 Principal coordinate analysis (PCoA, also known as multidimensional scaling) was calculated  
526 based on the Bray-Curtis dissimilarities between all fingerprints. The function *beta\_div\_fcm()*  
527 from the R package 'PhenoFlow' was used (Props et al. 2016).

## 528 Raman spectroscopy

529 Fixed samples were centrifuged at 1,957 x g for 5 min at room temperature and re-suspended  
530 in cold Milli-Q water (Merck-Millipore) (4°C). Then, a 5µL drop was allowed to dry until  
531 evaporation on a CaF<sub>2</sub> slide (grade 13 mm diameter by 0.5 mm polished disc, Crystran Ltd).  
532 As control for the instrument performance, a silica gel was measured with a grating of 600 –  
533 mm/g, with a 1 second time exposure and 10 accumulations. Laser power was also monitored  
534 to detect possible variations. Bacteria were measured with a grating of 300 –mm/g, with a 40  
535 second exposure time and 1 accumulation. More information on the Raman spectroscope and  
536 data collection is included in the Raman aid (see Table 3). The metadata were collected  
537 following the guidelines from (García-Timmermans et al. 2018) and can be found in the  
538 Supplementary Information.

539 Raman spectra pre-processing

540 The Raman spectra were analysed in the 600-1800  $\text{cm}^{-1}$  region, and baseline correction using  
541 the SNIP algorithm (ten iterations) and normalization were performed. The area under the  
542 curve (AUC) normalization was calculated with the MALDIquant package (v1.16.2) (Gibb and  
543 Strimmer 2012).

544 Single-cell analysis

545 *t-distributed stochastic neighborhood embedding (t-SNE)*

546 Raman single-cell data was analyze dusing t-SNE. The *TSNE()* function from the scikit-learn  
547 machine learning library was used. Principal component analysis was set as initialization  
548 method. TSNE was run with default settings unless reported otherwise. Each region in the  
549 spectra was normalized to have zero mean and standard deviation of one.

550 *Principal component analysis (PCA)*

551 Single-cell Raman spectra were analysed with the function *fviz\_pca\_ind()* from the R package  
552 'factoextra' (Kassambara and Mundt 2017) or with the *PCA()* function from the scikit-learn  
553 machine learning library after normalization of the spectra, so that each region has a mean of  
554 zero and standard deviation of one.

555 *Hierarchical clustering*

556 To measure how dissimilar the samples were, we calculated the spectral contrast angle (Wan,  
557 Vidavsky, and Gross 2002) between individual cells based on Raman spectra. Then, clusters  
558 were determined in an agglomerative way, through Ward's method (*ward.D2*) from the  
559 *fastcluster* R package (Müllner 2018). Hierarchical clustering was implemented using the  
560 *hclust()* function from the stats package (R Core Team 2018).

561 *PhenoGraph*

562 PhenoGraph is a clustering algorithm specifically designed for the analysis of high-dimensional  
563 flow- or mass-cytometry data (Levine et al. 2015). It employs a two-step approach, in which for  
564 every cell its *k*-nearest cells of similar phenotypic populations are grouped together. This

565 means that, if  $N$  denotes the number of cells,  $N$  neighbourhoods are created. Next, a weighted  
566 graph is created on these sets of cells. The weight between nodes scales with the number of  
567 neighbours that are shared. The Louvain community detection method is implemented to  
568 cluster the graph by maximizing the modularity of different groupings of the nodes (Blondel et  
569 al. 2008). The PhenoGraph algorithm was run with default settings, in which  $k$  was evaluated  
570 for different values between five and 100 ([github.com/jacoblevine/PhenoGraph](https://github.com/jacoblevine/PhenoGraph)). PhenoGraph  
571 was run after normalization of the spectra, to have zero mean and standard deviation of one.

#### 572 *Adjusted Rand Index*

573 Clustering results from both hierarchical clustering and PhenoGraph were quantified by the  
574 Adjusted Rand Index (ARI) (Hubert and Arabie 1985). The ARI was calculated with the  
575 `adjusted_rand_score()` function from the scikit-learn machine learning library (v0.19.1)  
576 (Pedregosa et al. 2011). The Rand index is defined as the number of pairs of instances that  
577 are in the same group or in different groups based on two partitions, which is divided by the  
578 total number of pairs of instances. This index is then corrected for the expected index, which  
579 is based on random clustering in which the elements per cluster are shuffled between clusters.  
580 A value of 1 resembles the perfect match between cluster assignments and ground truth labels,  
581 a value of 0 resembles random clustering and a negative value (up to -1) resembles arbitrarily  
582 worse clustering.

#### 583 *Boruta variable selection*

584 The Boruta variable selection extends on traditional variable selection using Random Forest  
585 based variable importance measures. The method includes shadow variables, which are  
586 copies of original variables that have been permuted. By performing a Random Forest  
587 analysis multiple times, one can decide by means of multiple hypothesis testing which  
588 variables are relevant with a certain significance level compared to the most relevant shadow  
589 variable (Kursa and Rudnicki 2010). It has been recently proposed as one of the most accurate  
590 and stable variable selection methods based on Random Forest based (Degenhardt, Seifert,

591 and Szymczak 2017). The Boruta algorithm from the *Boruta* R package was run, using the  
592 default settings (v6.0.0) (Kursa and Rudnicki 2010).

### 593 *Statistical test on Boruta outcome*

594 The ten most relevant regions for classification according to the Boruta algorithm were  
595 selected. The intensity of these peaks amongst the growth phases were compared with the  
596 Wilcoxon rank sum test with a Benjamini-Hochberg correction (upon rejection of the null  
597 hypothesis). The functions `pairwise.wilcox.test()` and `p.adjust()` from the R package `stats` v3.5.1  
598 (R Core Team 2018) were used.

### 599 *Data availability*

600 Data and code to reproduce analysis is available on the following repository:  
601 <https://github.com/CMET-Ugent/FCMvsRaman>.

602 Data analysis was conducted using the program R (R Core Team 2018), RStudio (RStudio  
603 team and RStudio 2016) and Python.

604

### 605 *External dataset*

606 We included the dataset from (Teng et al. 2016) in order to validate the generalizability of the  
607 PhenoGraph and t-SNE algorithms for the analysis of label-free bacterial Raman data. As  
608 described in their article, they tested the stress response of *E. coli* to six chemical stressors at  
609 different time intervals with label-free Raman spectroscopy: ethanol, antibiotics ampicillin and  
610 kanamycin, n-butanol or heavy metals  $\text{Cu}^{2+}$  ( $\text{CuSO}_4$ ) and  $\text{Cr}^{6+}$  ( $\text{K}_2\text{CrO}_4$ ). Teng et al. showed  
611 that each of these treatments resulted in a different phenotype. In other words, each treatment  
612 resulted in a unique Raman characterization of cells, which should group together upon  
613 analysis. These treatments were therefore used as label according to which PhenoGraph or t-  
614 SNE should group the cells. Three biological replicates of the cell culture were made, and 20  
615 cells were tested per replicate. Bacteria were sampled at different stages of the cell growth.  
616 The Raman spectra of the stressed cells were collected after the treatment (5, 10, 20, 30 and  
617 60 min, 3h and 5h).

618 *Data availability*

619 Our code and data to reproduce the analysis is available at [https://github.com/CMET-](https://github.com/CMET-Ugent/FCMvsRaman)  
620 [Ugent/FCMvsRaman](https://github.com/CMET-Ugent/FCMvsRaman).

## 621 **Conflicts of interest**

622 The authors declare that the research was conducted in the absence of any commercial or  
623 financial relationships that could be construed as a potential conflict of interest.

## 624 **Author contributions**

625 CGT and PR co-wrote the paper with contributions from JH, FMK, RP, AS, WW, and NB. CGT  
626 collected the data. PR, CGT and RP performed the data analysis. CGT, PR, JH, FMK, RP,  
627 WW and NB designed the study. All authors read and approved the final version of the  
628 manuscript.

## 629 **Acknowledgements**

630 The authors would like to thank the funding that made possible this research. CG is funded by  
631 Qindao Beibao Marine Science & Technology Co. Ltd., Qingdao West-coast economic new  
632 area, China. PR is funded by Special Research Fund (BOFSTA2015000501) from Ghent  
633 University. RP is funded by Ghent University (BOFDOC2015000601). JH is funded by the  
634 Flemish Fund for Scientific research (FWO-Vlaanderen, 1S80618N). AGS acknowledges  
635 support of BOF UGent (BOF14/IOP/003, BAS094-18, 01IO3618) and FWO-Vlaanderen  
636 (G043219). This work was supported through the Geconcerteerde Onderzoeksactie (GOA)  
637 from Ghent University (BOF15/GOA/006) and the MICCAS project (project grant no.  
638 3G020119 of the FWO Flanders). The authors would also like to thank Dmitry Khalenkov for  
639 his help setting up the Raman microscope.

640

## 641 Bibliography

- 642 Ackermann, Martin. 2015. "A Functional Perspective on Phenotypic Heterogeneity in  
643 Microorganisms." *Nature Reviews Microbiology* 13 (8): 497–508.  
644 <https://doi.org/10.1038/nrmicro3491>.
- 645 Almarashi, Jamal F. M., Natalia Kapel, Thomas S. Wilkinson, and Helmut H. Telle. 2012.  
646 "Raman Spectroscopy of Bacterial Species and Strains Cultivated under Reproducible  
647 Conditions." *Spectroscopy: An International Journal* 27 (5–6): 361–65.  
648 <https://doi.org/10.1155/2012/540490>.
- 649 Amir, El-ad David, Kara L Davis, Michelle D Tadmor, Erin F Simonds, Jacob H Levine, Sean  
650 C Bendall, Daniel K Shenfeld, Smita Krishnaswamy, Garry P Nolan, and Dana Pe'er.  
651 2013. "ViSNE Enables Visualization of High Dimensional Single-Cell Data and Reveals  
652 Phenotypic Heterogeneity of Leukemia." *Nature Biotechnology* 31 (6): 545–52.  
653 <https://doi.org/10.1038/nbt.2594>.
- 654 Andrews, Tallulah S., and Martin Hemberg. 2018. "Identifying Cell Populations with  
655 ScRNASeq." *Molecular Aspects of Medicine* 59: 114–22.  
656 <https://doi.org/10.1016/j.mam.2017.07.002>.
- 657 Anetzberger, Claudia, Ursula Schell, and Kirsten Jung. 2012. "Single Cell Analysis of *Vibrio*  
658 *Harveyi* Uncovers Functional Heterogeneity in Response to Quorum Sensing Signals."  
659 <https://doi.org/10.1186/1471-2180-12-209>.
- 660 Athamneh, A I M, R A Alajlouni, R S Wallace, M N Seleem, and R S Senger. 2014.  
661 "Phenotypic Profiling of Antibiotic Response Signatures in *Escherichia Coli* Using  
662 Raman Spectroscopy." *Antimicrobial Agents and Chemotherapy* 58 (3): 1302–14.  
663 <https://doi.org/10.1128/AAC.02098-13>.
- 664 Avery, Simon V. 2006. "Microbial Cell Individuality and the Underlying Sources of  
665 Heterogeneity." *Nature Reviews Microbiology* 4 (8): 577–87.  
666 <https://doi.org/10.1038/nrmicro1460>.
- 667 Barbesti, Silvia, Sandra Citterio, Massimo Labra, Maurizio Davide Baroni, Maria Grazia Neri,  
668 and Sergio Sgorbati. 2000. "Two and Three-Color Fluorescence Flow Cytometric  
669 Analysis of Immunoidentified Viable Bacteria." *Cytometry* 40 (3): 214–18.  
670 [https://doi.org/10.1002/1097-0320\(20000701\)40:3<214::AID-CYTO6>3.0.CO;2-M](https://doi.org/10.1002/1097-0320(20000701)40:3<214::AID-CYTO6>3.0.CO;2-M).
- 671 Berry, David, Esther Mader, Tae Kwon Lee, Dagmar Woebken, Yun Wang, Di Zhu, Marton  
672 Palatinszky, et al. 2015. "Tracking Heavy Water (D2O) Incorporation for Identifying and  
673 Sorting Active Microbial Cells." *Proceedings of the National Academy of Sciences* 112  
674 (2): E194–203. <https://doi.org/10.1073/PNAS.1420406112>.
- 675 Beye, M., N. Fahsi, D. Raoult, and P.-E. Fournier. 2018. "Careful Use of 16S rRNA Gene  
676 Sequence Similarity Values for the Identification of *Mycobacterium* Species." *New*  
677 *Microbes and New Infections* 22 (March): 24–29.  
678 <https://doi.org/10.1016/J.NMNI.2017.12.009>.
- 679 Bhattacharjee, Arunima, Rupsa Datta, Enrico Gratton, and Allon I Hochbaum. 2017.  
680 "Metabolic Fingerprinting of Bacteria by Fluorescence Lifetime Imaging Microscopy."  
681 *Scientific Reports* 7 (1): 3743. <https://doi.org/10.1038/s41598-017-04032-w>.
- 682 Blondel, Vincent D., Jean Loup Guillaume, Renaud Lambiotte, and Etienne Lefebvre. 2008.  
683 "Fast Unfolding of Communities in Large Networks." *Journal of Statistical Mechanics:*  
684 *Theory and Experiment* 2008 (10). <https://doi.org/10.1088/1742-5468/2008/10/P10008>.
- 685 Buyschaert, Benjamin, Bo Byloos, Natalie Leys, Rob Van Houdt, and Nico Boon. 2016.  
686 "Reevaluating Multicolor Flow Cytometry to Assess Microbial Viability." *Applied*  
687 *Microbiology and Biotechnology* 100 (21): 9037–51. <https://doi.org/10.1007/s00253-016-7837-5>.
- 688  
689 Candeloro, Patrizio, Elisabetta Grande, Raffaella Raimondo, Daniele Di Mascolo, Francesco  
690 Gentile, Maria Laura Coluccio, Gerardo Perozziello, Natalia Malara, Marco Francardi,  
691 and Enzo Di Fabrizio. 2013. "Raman Database of Amino Acids Solutions: A Critical  
692 Study of Extended Multiplicative Signal Correction." *The Analyst* 138 (24): 7331.  
693 <https://doi.org/10.1039/c3an01665j>.
- 694 Ceuppens, Siele, Nico Boon, and Mieke Uyttendaele. 2013. "Diversity of *Bacillus Cereus*

- 695 Group Strains Is Reflected in Their Broad Range of Pathogenicity and Diverse  
696 Ecological Lifestyles." *FEMS Microbiology Ecology*. [https://doi.org/10.1111/1574-](https://doi.org/10.1111/1574-6941.12110)  
697 6941.12110.
- 698 Cowcher, David P., Yun Xu, and Royston Goodacre. 2013. "Portable, Quantitative Detection  
699 of *Bacillus* Bacterial Spores Using Surface-Enhanced Raman Scattering." *Analytical*  
700 *Chemistry* 85 (6): 3297–3302. <https://doi.org/10.1021/ac303657k>.
- 701 Davey, Hazel M., and Douglas B. Kell. 1996. "Flow Cytometry and Cell Sorting of  
702 Heterogeneous Microbial Populations: The Importance of Single-Cell Analyses."  
703 *Microbiological Reviews* 60 (4): 641–96.  
704 <https://doi.org/https://mmb.asm.org/content/60/4/641>.
- 705 Davis, Kimberly M, and Ralph R Isberg. 2016. "Defining Heterogeneity within Bacterial  
706 Populations via Single Cell Approaches." *BioEssays*.  
707 <https://doi.org/10.1002/bies.201500121>.
- 708 Degenhardt, Frauke, Stephan Seifert, and Silke Szymczak. 2017. "Evaluation of Variable  
709 Selection Methods for Random Forests and Omics Data Sets." *Briefings in*  
710 *Bioinformatics*, no. November: 1–12. <https://doi.org/10.1093/bib/bbx124>.
- 711 Dhar, Neeraj, and John D McKinney. 2007. "Microbial Phenotypic Heterogeneity and  
712 Antibiotic Tolerance." *Current Opinion in Microbiology* 10 (1): 30–38.  
713 <https://doi.org/10.1016/J.MIB.2006.12.007>.
- 714 Díaz, Mario, Mónica Herrero, Luis A. García, and Covadonga Quirós. 2010. "Application of  
715 Flow Cytometry to Industrial Microbial Bioprocesses." *Biochemical Engineering Journal*  
716 48 (3): 385–407. <https://doi.org/10.1016/J.BEJ.2009.07.013>.
- 717 García-Timmermans, Cristina, Peter Rubbens, Frederiek Maarten Kerckhof, Benjamin  
718 Buysschaert, Dmitry Khalenkov, Willem Waegeman, Andre G. Skirtach, and Nico Boon.  
719 2018. "Label-Free Raman Characterization of Bacteria Calls for Standardized  
720 Procedures." *Journal of Microbiological Methods* 151 (August): 69–75.  
721 <https://doi.org/10.1016/j.mimet.2018.05.027>.
- 722 Georgakoudi, Irene, Irene Tsai, Cherry Greiner, Cheryl Wong, Jordy DeFelice, and David  
723 Kaplan. 2007. "Intrinsic Fluorescence Changes Associated with the Conformational  
724 State of Silk Fibroin in Biomaterial Matrices." *Optics Express* 15 (3): 1043.  
725 <https://doi.org/10.1364/OE.15.001043>.
- 726 Gibb, Sebastian, and Korbinian Strimmer. 2012. "MALDIquant: A Versatile R Package for the  
727 Analysis of Mass Spectrometry Data," March.  
728 <https://doi.org/10.1093/bioinformatics/bts447>.
- 729 Goodacre, R., e. M Timmins, R. Burton, N. Kaderbhai, A. M. Woodward, D. B. Kell, and P. J.  
730 Rooney. 1998. "Rapid Identification of Urinary Tract Infection Bacteria Using  
731 Hyperspectral Whole-Organism Fingerprinting and Artificial Neural Networks."  
732 *Microbiology* 144 (5): 1157–70. <https://doi.org/10.1099/00221287-144-5-1157>.
- 733 Govers, Sander K., Antoine Adam, Hendrik Blockeel, and Abram Aertsen. 2017. "Rapid  
734 Phenotypic Individualization of Bacterial Sister Cells." *Scientific Reports*.  
735 <https://doi.org/10.1038/s41598-017-08660-0>.
- 736 Huang, Wei E., Mengqiu Li, Roger M. Jarvis, Royston Goodacre, and Steven A. Banwart.  
737 2010. "Shining Light on the Microbial World: The Application of Raman  
738 Microspectroscopy." *Advances in Applied Microbiology* 70 (January): 153–86.  
739 [https://doi.org/10.1016/S0065-2164\(10\)70005-8](https://doi.org/10.1016/S0065-2164(10)70005-8).
- 740 Hubert, Lawrence, and Phipps Arabie. 1985. "The Transition from Bargaining to a Competitive  
741 Market." *Journal of Classification* 2: 193:218. <https://doi.org/10.1007/BF01908075>.
- 742 Jahn, Michael, Jana Seifert, Martin von Bergen, Andreas Schmid, Bruno Bühler, and Susann  
743 Müller. 2013. "Subpopulation-Proteomics in Prokaryotic Populations." *Current Opinion in*  
744 *Biotechnology* 24 (1): 79–87. <https://doi.org/10.1016/j.copbio.2012.10.017>.
- 745 Jarvis, Roger M., and Royston Goodacre. 2004. "Discrimination of Bacteria Using Surface-  
746 Enhanced Raman Spectroscopy." *Analytical Chemistry* 76 (1): 40–47.  
747 <https://doi.org/10.1021/ac034689c>.
- 748 Jehlička, Jan, Howell G. M. Edwards, and Aharon Oren. 2014. "Raman Spectroscopy of



- 749 Microbial Pigments.” *Applied and Environmental Microbiology* 80 (11): 3286.  
750 <https://doi.org/10.1128/AEM.00699-14>.
- 751 Kassambara, Alboukadel, and Fabian Mundt. 2017. “Factoextra: Extract and Visualize the  
752 Results of Multivariate Data Analyses.” *R Package Version*.  
753 <https://doi.org/https://CRAN.R-project.org/package=factoextra>.
- 754 Kim, M., H.-S. Oh, S.-C. Park, and J. Chun. 2014. “Towards a Taxonomic Coherence  
755 between Average Nucleotide Identity and 16S rRNA Gene Sequence Similarity for  
756 Species Demarcation of Prokaryotes.” *INTERNATIONAL JOURNAL OF SYSTEMATIC  
757 AND EVOLUTIONARY MICROBIOLOGY* 64 (Pt 2): 346–51.  
758 <https://doi.org/10.1099/ijs.0.059774-0>.
- 759 Koch, Christin, Falk Harnisch, Uwe Schröder, and Susann Müller. 2014. “Cytometric  
760 Fingerprints: Evaluation of New Tools for Analyzing Microbial Community Dynamics.”  
761 *Frontiers in Microbiology* 5: 273. <https://doi.org/10.3389/fmicb.2014.00273>.
- 762 Koch, Christin, and Susann Müller. 2018. “Personalized Microbiome Dynamics – Cytometric  
763 Fingerprints for Routine Diagnostics.” *Molecular Aspects of Medicine* 59 (February):  
764 123–34. <https://doi.org/10.1016/J.MAM.2017.06.005>.
- 765 Kursa, Miron B, and Witold R Rudnicki. 2010. “Feature Selection with the Boruta Package.”  
766 *Journal Of Statistical Software* 36 (11): 1–13. [https://doi.org/Vol. 36, Issue 11, Sep  
767 2010](https://doi.org/Vol.36,Issue11,Sep2010).
- 768 Lee, Harry L.T., Paolo Boccazzi, Nathalie Gorret, Rajeev J. Ram, and Anthony J. Sinskey.  
769 2004. “In Situ Bioprocess Monitoring of Escherichia Coli Bioreactions Using Raman  
770 Spectroscopy.” *Vibrational Spectroscopy* 35 (1–2): 131–37.  
771 <https://doi.org/10.1016/J.VIBSPEC.2003.12.015>.
- 772 Léonard, Lucie, Lynda Bouarab Chibane, Balkis Ouled Bouhedda, Pascal Degraeve, and  
773 Nadia Oulahal. 2016. “Recent Advances on Multi-Parameter Flow Cytometry to  
774 Characterize Antimicrobial Treatments.” *Frontiers in Microbiology* 7: 1225.  
775 <https://doi.org/10.3389/fmicb.2016.01225>.
- 776 Levine, Jacob H., Erin F. Simonds, Sean C. Bendall, Kara L. Davis, El Ad D Amir, Michelle  
777 D. Tadmor, Oren Litvin, et al. 2015. “Data-Driven Phenotypic Dissection of AML Reveals  
778 Progenitor-like Cells That Correlate with Prognosis.” *Cell* 162 (1): 184–97.  
779 <https://doi.org/10.1016/j.cell.2015.05.047>.
- 780 Liu, Chia-Ying, Yin-Yi Han, Po-Han Shih, Wei-Nan Lian, Huai-Hsien Wang, Chi-Hung Lin,  
781 Po-Ren Hsueh, Juen-Kai Wang, and Yuh-Lin Wang. 2016. “Rapid Bacterial Antibiotic  
782 Susceptibility Test Based on Simple Surface-Enhanced Raman Spectroscopic  
783 Biomarkers.” *Scientific Reports* 6 (March): 23375. <https://doi.org/10.1038/srep23375>.
- 784 Maaten, L J P Van Der, and G E Hinton. 2008. “Visualizing High-Dimensional Data Using t-  
785 Sne.” *Journal of Machine Learning Research* 9: 2579–2605.  
786 <https://doi.org/10.1007/s10479-011-0841-3>.
- 787 Mair, Florian, and Martin Prlic. 2018. “OMIP-044: 28-Color Immunophenotyping of the  
788 Human Dendritic Cell Compartment.” *Cytometry Part A* 93A: 402–5.  
789 <https://doi.org/10.1002/cyto.a.23331>.
- 790 Maquelin, Kees, Lenie Dijkshoorn, Tanny J K van der Reijden, and Gerwin J Puppels. 2006.  
791 “Rapid Epidemiological Analysis of Acinetobacter Strains by Raman Spectroscopy.”  
792 *Journal of Microbiological Methods* 64 (1): 126–31.  
793 <https://doi.org/10.1016/j.mimet.2005.04.028>.
- 794 McIlvanna, David, Wei E. Huang, Paul Davison, Andrew Gidle, Jon Cooper, and Huabing  
795 Yin. 2016. “Continuous Cell Sorting in a Flow Based on Single Cell Resonance Raman  
796 Spectra.” *Lab on a Chip* 16 (8): 1420–29. <https://doi.org/10.1039/C6LC00251J>.
- 797 Müllner, Daniel. 2018. “The Fastcluster Package: User’s Manual Version 1.1.25.”
- 798 Mysara, Mohamed, Peter Vandamme, Ruben Props, Frederiek-Maarten Kerckhof, Natalie  
799 Leys, Nico Boon, Jeroen Raes, and Pieter Monsieurs. 2017. “Reconciliation between  
800 Operational Taxonomic Units and Species Boundaries.” *FEMS Microbiology Ecology* 93  
801 (4). <https://doi.org/10.1093/femsec/fix029>.
- 802 Nebe-von-Caron, G, P.J Stephens, C.J Hewitt, J.R Powell, and R.A Badley. 2000. “Analysis  
803 of Bacterial Function by Multi-Colour Fluorescence Flow Cytometry and Single Cell

- 804        Sorting.” *Journal of Microbiological Methods* 42 (1): 97–114.  
805        [https://doi.org/10.1016/S0167-7012\(00\)00181-0](https://doi.org/10.1016/S0167-7012(00)00181-0).
- 806        Nevel, Sam Van, Stefan Koetzsch, Hans Ulrich Weilenmann, Nico Boon, and Frederik  
807        Hammes. 2013. “Routine Bacterial Analysis with Automated Flow Cytometry.” *Journal of*  
808        *Microbiological Methods*. <https://doi.org/10.1016/j.mimet.2013.05.007>.
- 809        Novelli-Rousseau, A., I. Espagnon, D. Filiputti, O. Gal, A. Douet, F. Mallard, and Q. Josso.  
810        2018. “Culture-Free Antibiotic-Susceptibility Determination From Single-Bacterium  
811        Raman Spectra.” *Scientific Reports* 8 (1): 3957. [https://doi.org/10.1038/s41598-018-](https://doi.org/10.1038/s41598-018-22392-9)  
812        22392-9.
- 813        O’Neill, Kieran, Nima Aghaeepour, Josef Špidlen, and Ryan Brinkman. 2013. “Flow  
814        Cytometry Bioinformatics.” *PLoS Computational Biology* 9 (12).  
815        <https://doi.org/10.1371/journal.pcbi.1003365>.
- 816        Pahlow, Susanne, Susann Meisel, Dana Cialla-May, Karina Weber, Petra Rösch, and Jürgen  
817        Popp. 2015. “Isolation and Identification of Bacteria by Means of Raman Spectroscopy.”  
818        *Advanced Drug Delivery Reviews* 89 (July): 105–20.  
819        <https://doi.org/10.1016/j.addr.2015.04.006>.
- 820        Pedregosa, Fabian, Gaël Varoquaux, Alexandre Gramfort, Vincent Michel, Bertrand Thirion,  
821        Olivier Grisel, Mathieu Blondel, et al. 2011. “Scikit-Learn: Machine Learning in Python.”  
822        *Journal of Machine Learning Research* 12 (Oct): 2825–30.
- 823        Perfetto, Stephen P., Pratip K. Chattopadhyay, and Mario Roederer. 2004. “Seventeen-  
824        Colour Flow Cytometry: Unravelling the Immune System.” *Nature Reviews Immunology*  
825        4 (8): 648–55. <https://doi.org/10.1038/nri1416>.
- 826        Perozziello, Gerardo, Patrizio Candeloro, Antonio De Grazia, Francesco Esposito, Marco  
827        Allione, Maria Laura Coluccio, Rossana Tallerico, et al. 2016. “Microfluidic Device for  
828        Continuous Single Cells Analysis via Raman Spectroscopy Enhanced by Integrated  
829        Plasmonic Nanodimers.” *Optics Express* 24 (2): A180.  
830        <https://doi.org/10.1364/OE.24.00A180>.
- 831        Props, Ruben, Pieter Monsieurs, Mohamed Mysara, Lieven Clement, and Nico Boon. 2016.  
832        “Measuring the Biodiversity of Microbial Communities by Flow Cytometry.” *METHODS*  
833        *IN ECOLOGY AND EVOLUTION*.
- 834        R Core Team. 2018. “R: A Language and Environment for Statistical Computing.” *R*  
835        *Foundation for Statistical Computing*. <https://doi.org/10.1007/978-3-540-74686-7>.
- 836        Roy, Karen De, Lieven Clement, Olivier Thas, Yingying Wang, and Nico Boon. 2012. “Flow  
837        Cytometry for Fast Microbial Community Fingerprinting.” *Water Research* 46: 907–19.  
838        <https://doi.org/10.1016/j.watres.2011.11.076>.
- 839        RStudio team, and RStudio. 2016. “RStudio: Integrated Development Environment for R.”  
840        Ruckdeschel, Peter ; Kohl, Matthias; Stabla, Thomas ; Camphausen, Florian. 2006. “Package  
841        ‘Distr.’”
- 842        Ryabchykov, Oleg, Shuxia Guo, and Thomas Bocklitz. 2018. “Analyzing Raman  
843        Spectroscopic Data.” *Physical Sciences Reviews* 0 (0): 1–16.  
844        <https://doi.org/10.1515/psr-2017-0043>.
- 845        Saeys, Yvan, Sofie Van Gassen, and Bart N. Lambrecht. 2016. “Computational Flow  
846        Cytometry: Helping to Make Sense of High-Dimensional Immunology Data.” *Nature*  
847        *Reviews Immunology*. <https://doi.org/10.1038/nri.2016.56>.
- 848        Sanchez-Romero, M. A., and J. Casadesus. 2014. “Contribution of Phenotypic Heterogeneity  
849        to Adaptive Antibiotic Resistance.” *Proceedings of the National Academy of Sciences*  
850        111 (1): 355–60. <https://doi.org/10.1073/pnas.1316084111>.
- 851        Samek, Ota, Stanislav Obruča, Martin Šiler, Petr Sedláček, Pavla Benešová, Dan Kučera,  
852        Ivana Márova, Jan Ježek, Silva Bernatová, and Pavel Zemánek. 2016. “Quantitative  
853        Raman Spectroscopy Analysis of Polyhydroxyalkanoates Produced by *Cupriavidus*  
854        *Necator H16*.” *Sensors (Basel, Switzerland)* 16 (11). <https://doi.org/10.3390/s16111808>.
- 855        Spitzer, Matthew H, and Garry P Nolan. 2016. “Leading Edge Primer Mass Cytometry: Single  
856        Cells, Many Features.” <https://doi.org/10.1016/j.cell.2016.04.019>.
- 857        Sprouffs, Kathleen, and Andreas Wagner. 2016. “Growthcurver: An R Package for  
858        Obtaining Interpretable Metrics from Microbial Growth Curves.” *BMC Bioinformatics*.

- 859 <https://doi.org/10.1186/s12859-016-1016-7>.
- 860 Stackebrandt, E., and B. M. Goebel. 1994. "Taxonomic Note: A Place for DNA-DNA  
861 Reassociation and 16S rRNA Sequence Analysis in the Present Species Definition in  
862 Bacteriology." *International Journal of Systematic and Evolutionary Microbiology* 44 (4):  
863 846–49. [https://doi.org/10.1016/S0140-6736\(01\)43317-4](https://doi.org/10.1016/S0140-6736(01)43317-4).
- 864 Stewart, Mary K, Lisa A Cummings, Matthew L Johnson, Alex B Berezow, and Brad T  
865 Cookson. 2011. "Regulation of Phenotypic Heterogeneity Permits Salmonella Evasion  
866 of the Host Caspase-1 Inflammatory Response." *Proceedings of the National Academy  
867 of Sciences of the United States of America* 108 (51): 20742–47.  
868 <https://doi.org/10.1073/pnas.1108963108>.
- 869 Strola, Samy Andrea, Jean-Charles Baritoux, Emmanuelle Schultz, Anne Catherine Simon,  
870 Cédric Allier, Isabelle Espagnon, Dorothee Jary, and Jean-Marc Dinten. 2014. "Single  
871 Bacteria Identification by Raman Spectroscopy." *Journal of Biomedical Optics* 19 (11):  
872 111610. <https://doi.org/10.1117/1.JBO.19.11.111610>.
- 873 Tang, Fuchou, Kaiqin Lao, and M Azim Surani. 2011. "Development and Applications of  
874 Single-Cell Transcriptome Analysis." *Nature Methods* 8 (4 Suppl): S6-11.  
875 <https://doi.org/10.1038/nmeth.1557>.
- 876 Taniguchi, Yuichi, Paul J Choi, Gene-Wei Li, Huiyi Chen, Mohan Babu, Jeremy Hearn,  
877 Andrew Emili, and X Sunney Xie. 2010. "Quantifying E. Coli Proteome and  
878 Transcriptome with Single-Molecule Sensitivity in Single Cells." *Science (New York,  
879 N. Y.)* 329 (5991): 533–38. <https://doi.org/10.1126/science.1188308>.
- 880 Teng, Lin, Xian Wang, Xiaojun Wang, Honglei Gou, Lihui Ren, Tingting Wang, Yun Wang,  
881 Yuetong Ji, Wei E. Huang, and Jian Xu. 2016. "Label-Free, Rapid and Quantitative  
882 Phenotyping of Stress Response in E. Coli via Ramanome." *Scientific Reports* 6 (1):  
883 34359. <https://doi.org/10.1038/srep34359>.
- 884 Wan, Katty X., Ilan Vidavsky, and Michael L. Gross. 2002. "Comparing Similar Spectra: From  
885 Similarity Index to Spectral Contrast Angle." *Journal of the American Society for Mass  
886 Spectrometry* 13 (1): 85–88. [https://doi.org/10.1016/S1044-0305\(01\)00327-0](https://doi.org/10.1016/S1044-0305(01)00327-0).
- 887 Watson, Dakota A., Leif O. Brown, Daniel F. Gaskill, Mark Naivar, Steven W. Graves,  
888 Stephen K. Doorn, and John P. Nolan. 2008. "A Flow Cytometer for the Measurement of  
889 Raman Spectra." *Cytometry Part A* 73A (2): 119–28.  
890 <https://doi.org/10.1002/cyto.a.20520>.
- 891 Xie, Changan, De Chen, and Yong-qing Li. 2005. "Raman Sorting and Identification of Single  
892 Living Micro-Organisms with Optical Tweezers." *Optics Letters* 30 (14): 1800.  
893 <https://doi.org/10.1364/OL.30.001800>.
- 894 Yashchenok, Alexey, Admir Masic, Dmitry Gorin, Bong Sup Shim, Nicholas A. Kotov, Peter  
895 Fratzl, Helmuth Möhwald, and Andre Skirtach. 2013. "Nanoengineered Colloidal Probes  
896 for Raman-Based Detection of Biomolecules inside Living Cells." *Small* 9 (3): 351–56.  
897 <https://doi.org/10.1002/smll.201201494>.
- 898 Zhang, Peiran, Lihui Ren, Xu Zhang, Yufei Shan, Yun Wang, Yuetong Ji, Huabing Yin, Wei  
899 E. Huang, Jian Xu, and Bo Ma. 2015. "Raman-Activated Cell Sorting Based on  
900 Dielectrophoretic Single-Cell Trap and Release." *Analytical Chemistry* 87 (4): 2282–89.  
901 <https://doi.org/10.1021/ac503974e>.
- 902
- 903
- 904
- 905
- 906

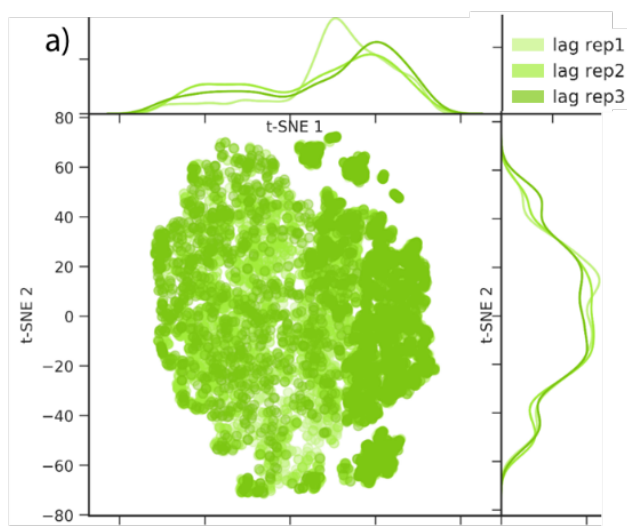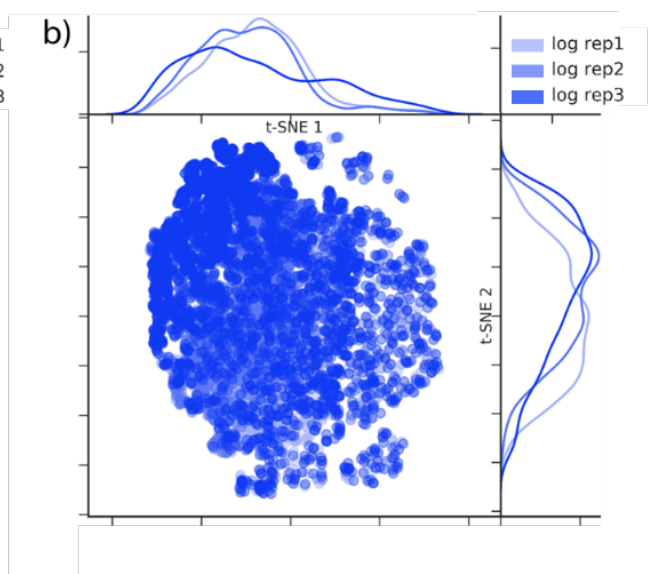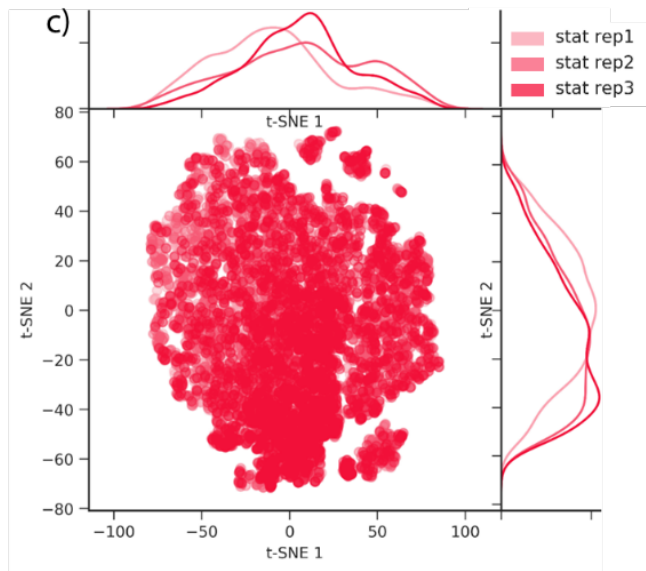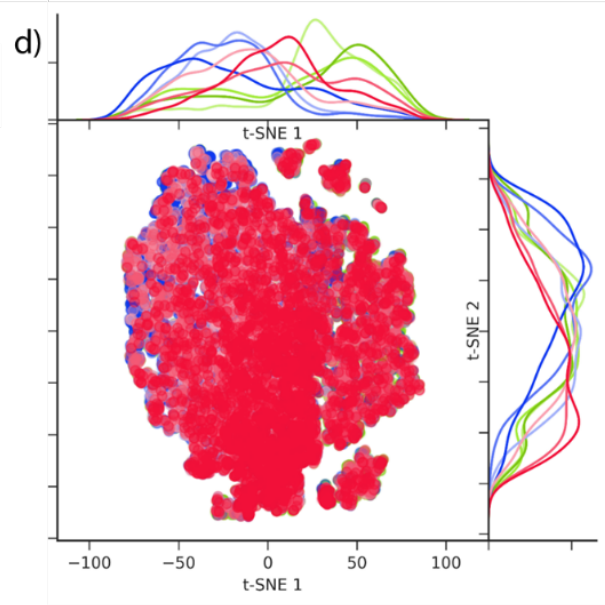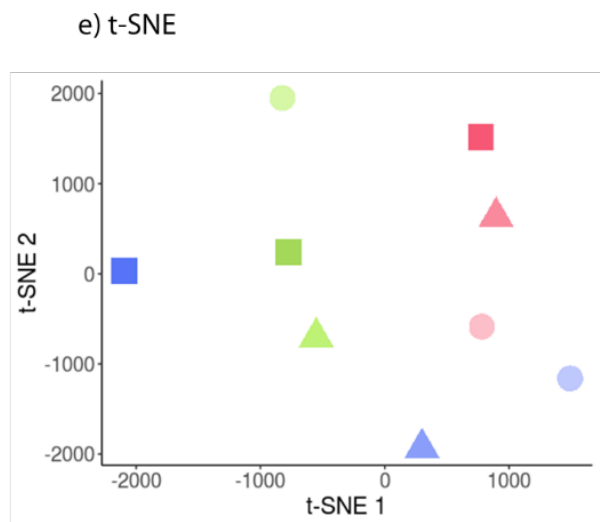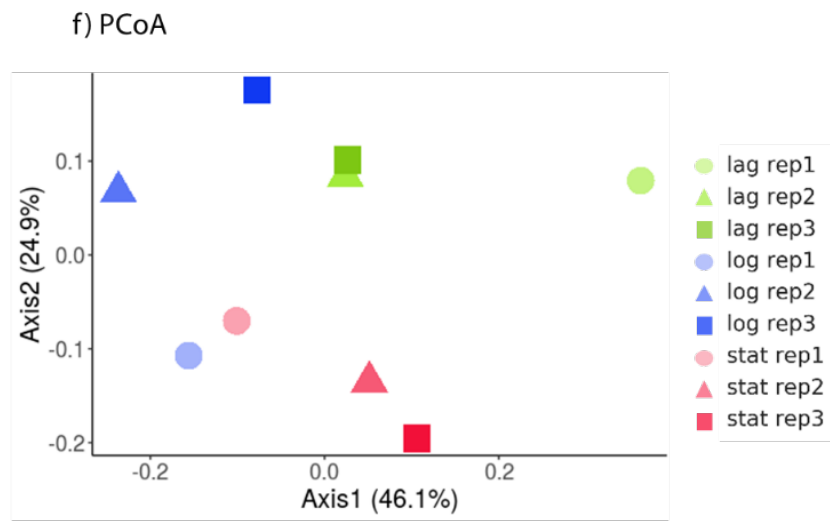

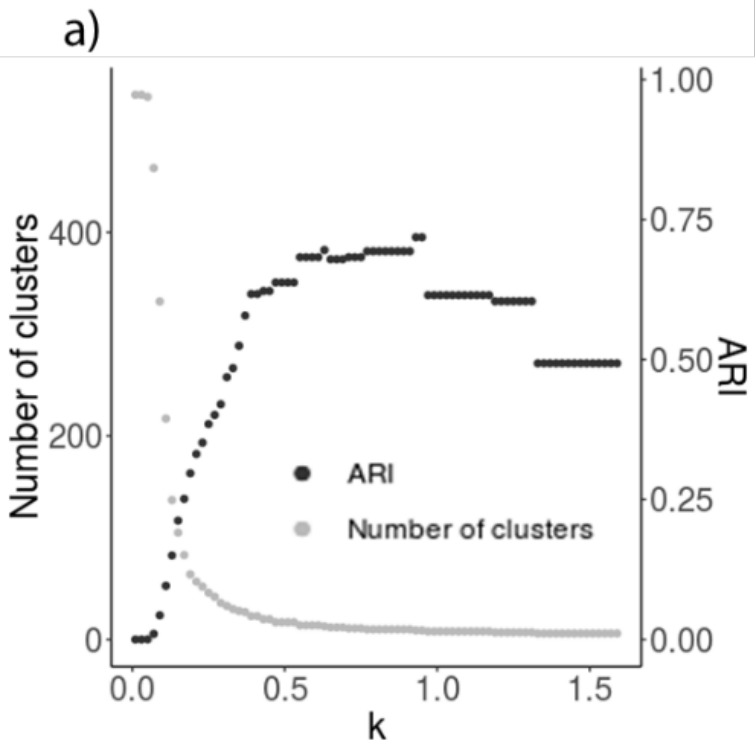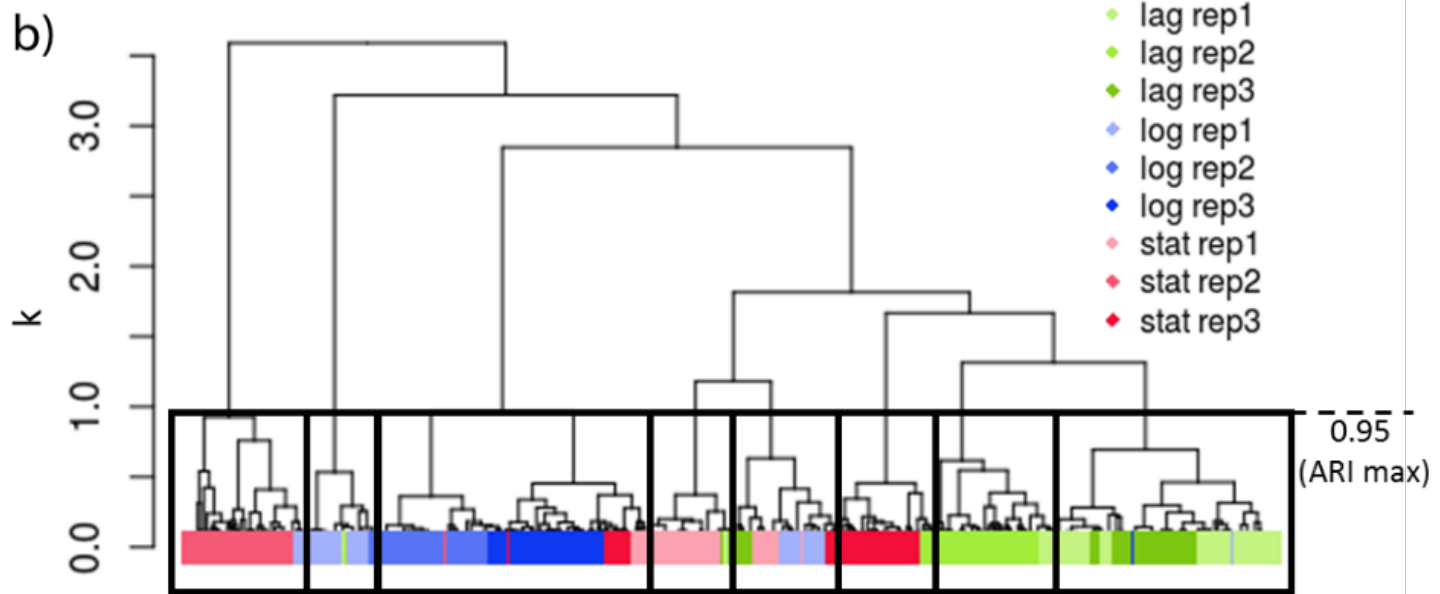

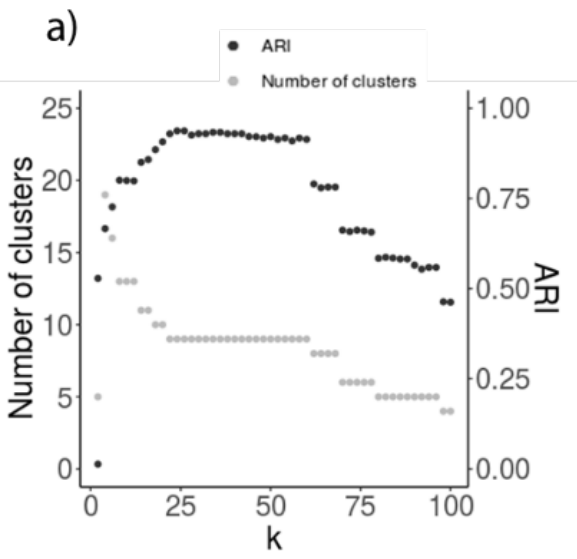

PhenoGraph automated clustering

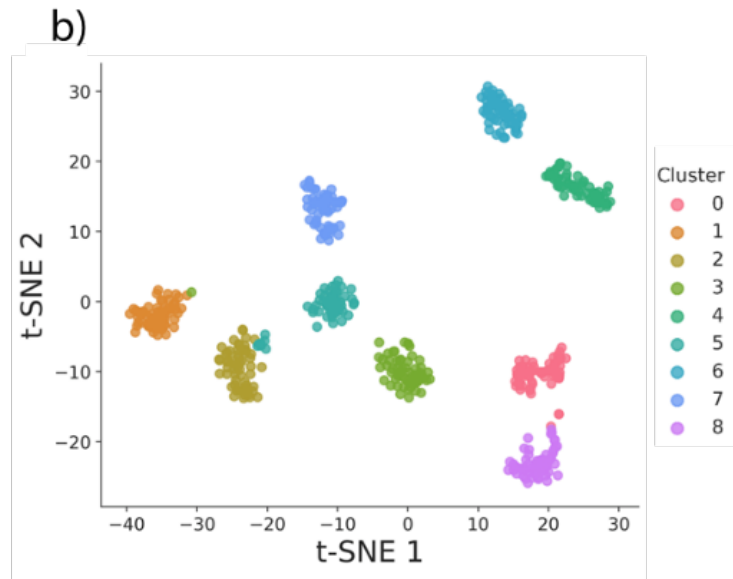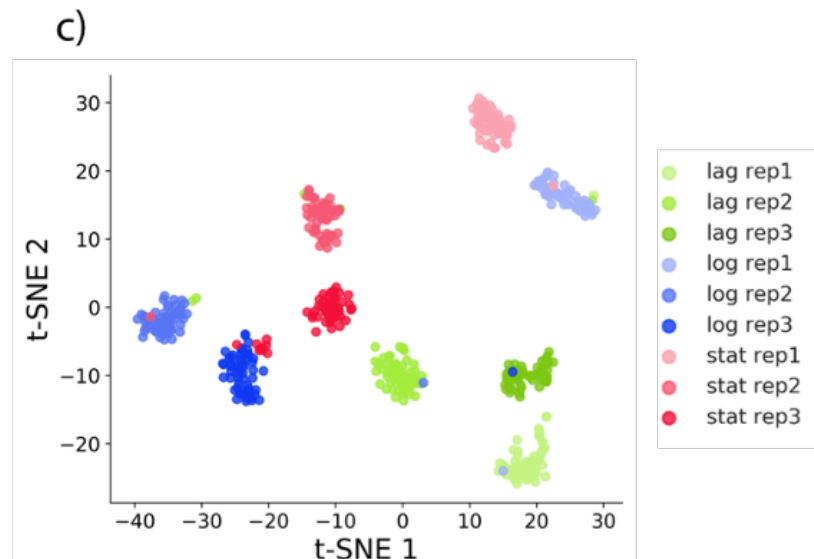

Observed clusters with t-SNE

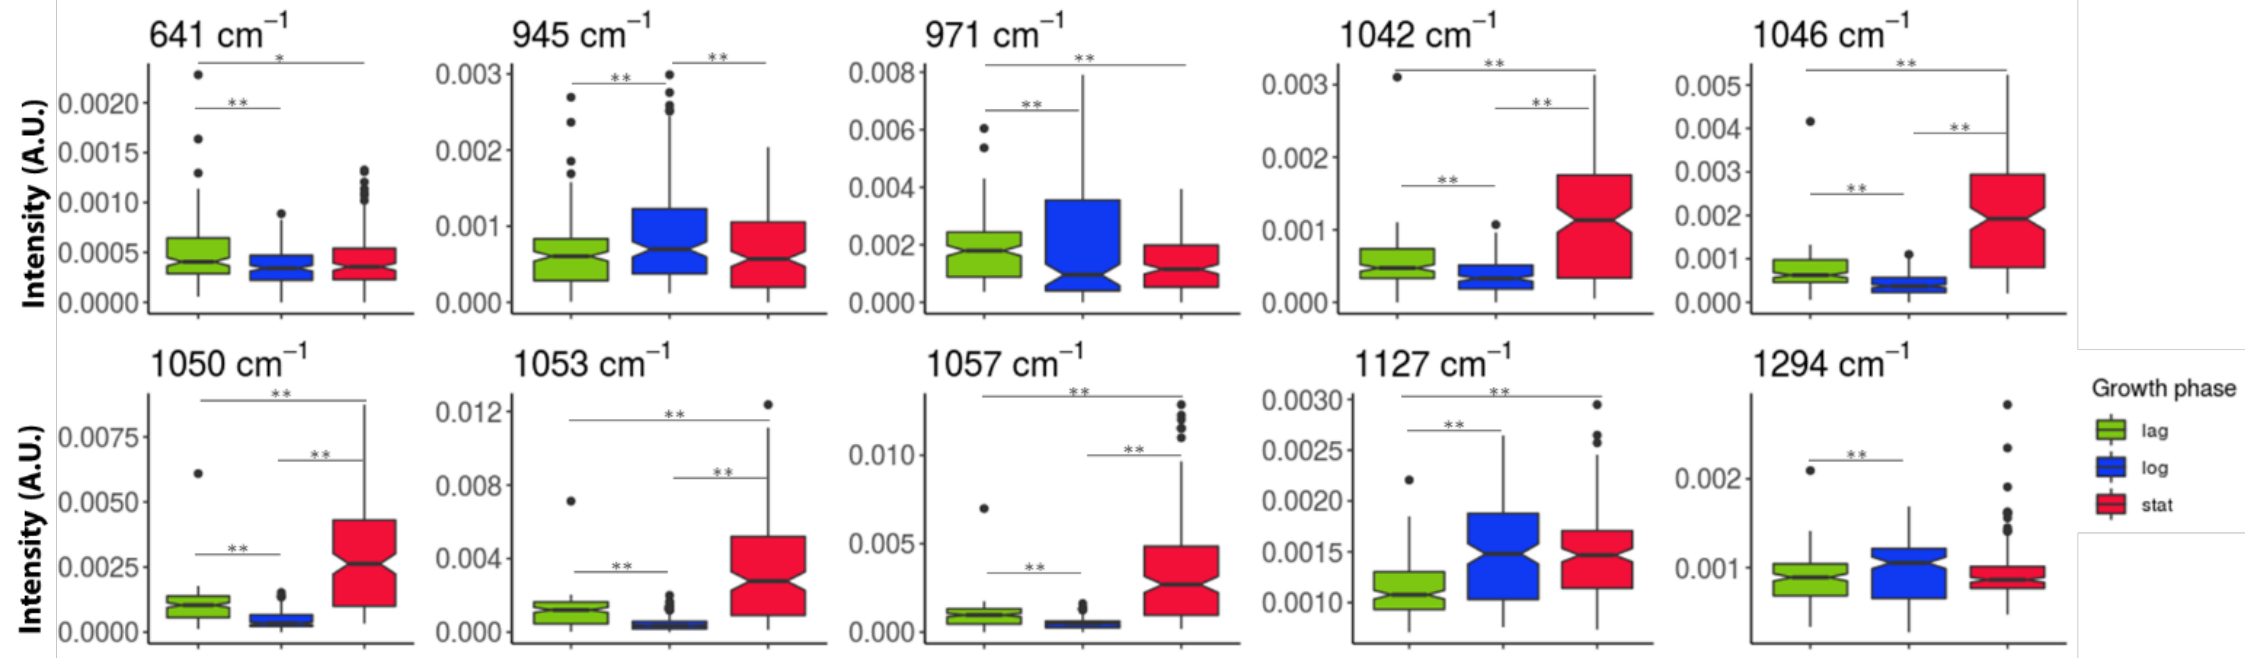

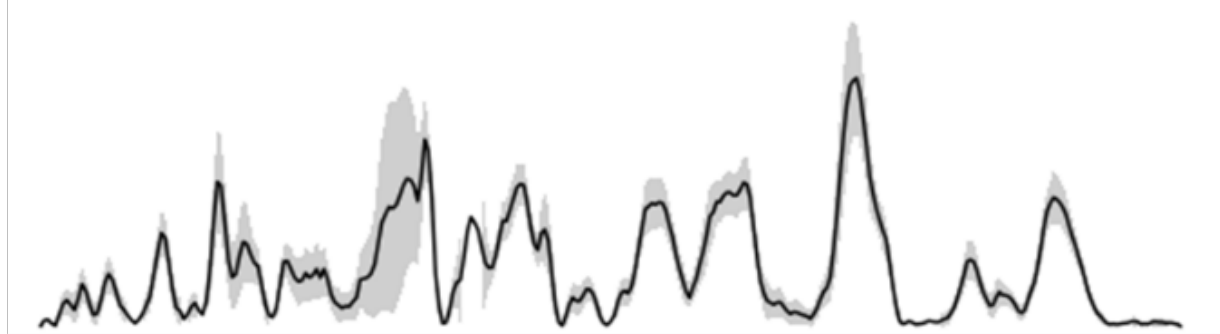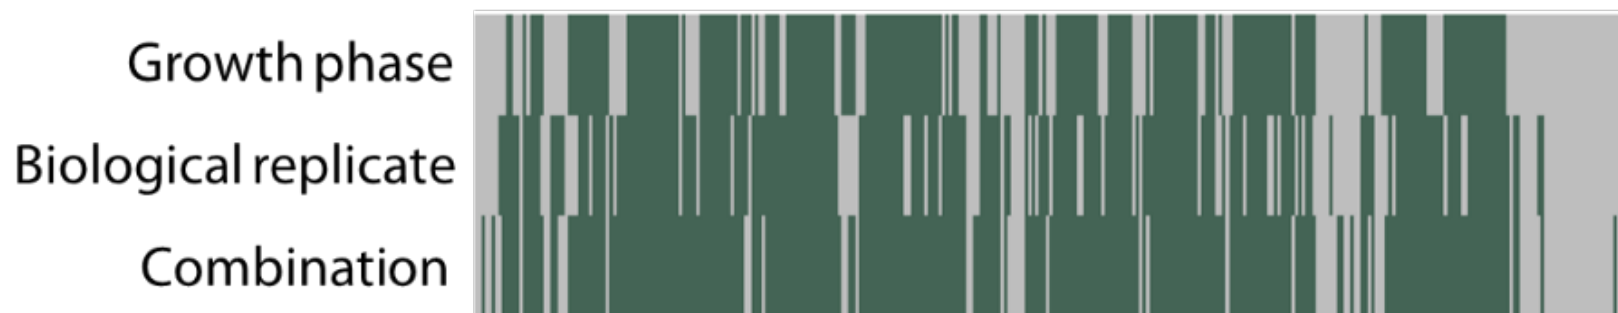

Boruta algorithm result:  
■ Included  
■ Rejected

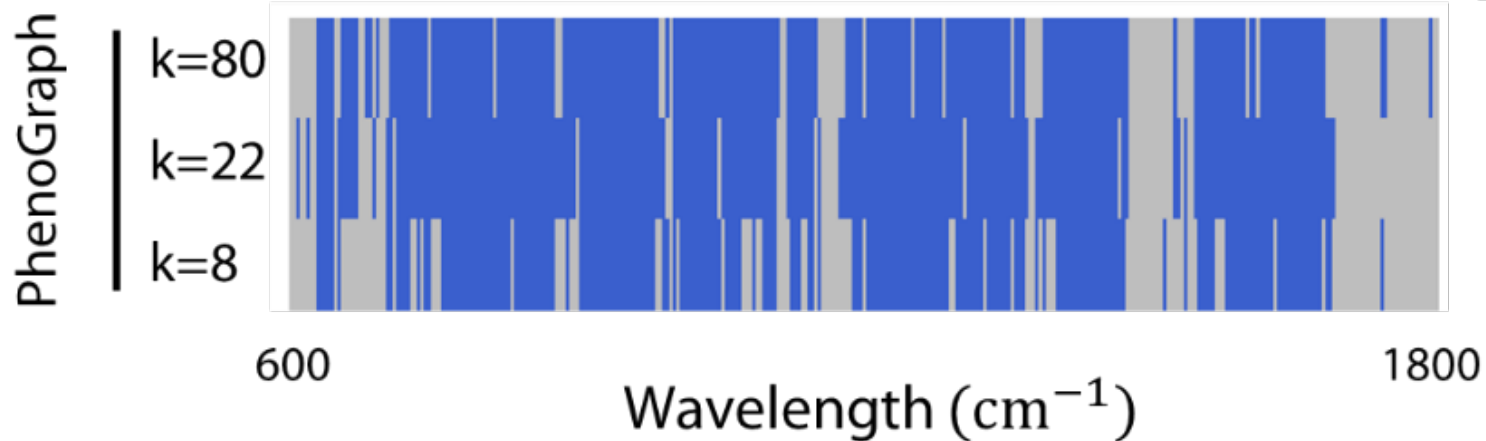



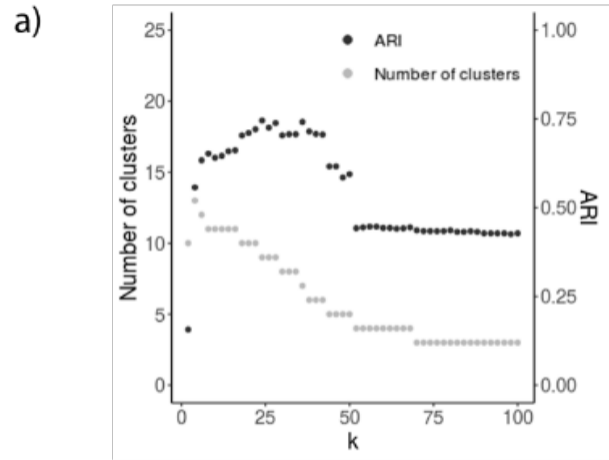

PhenoGraph automated clustering

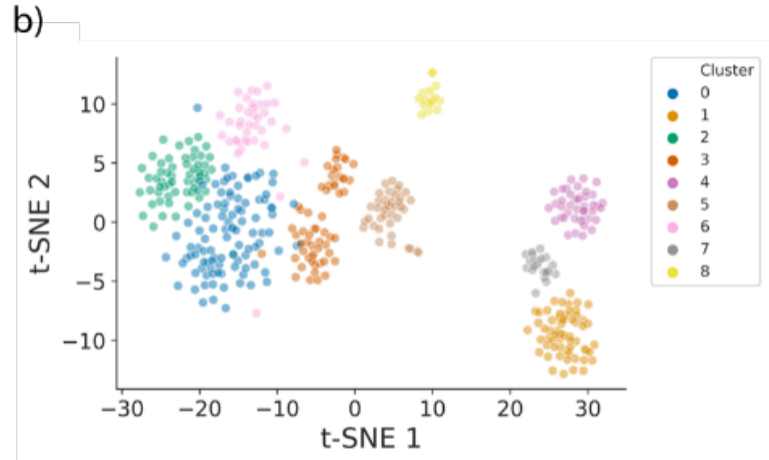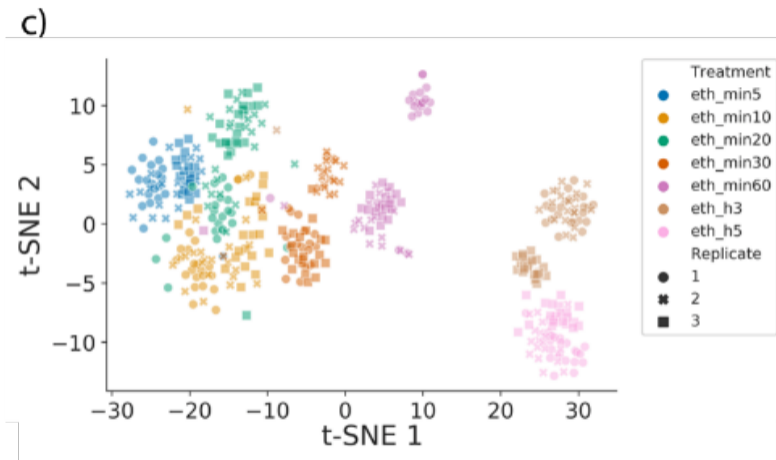

Observed clusters with t-SNE

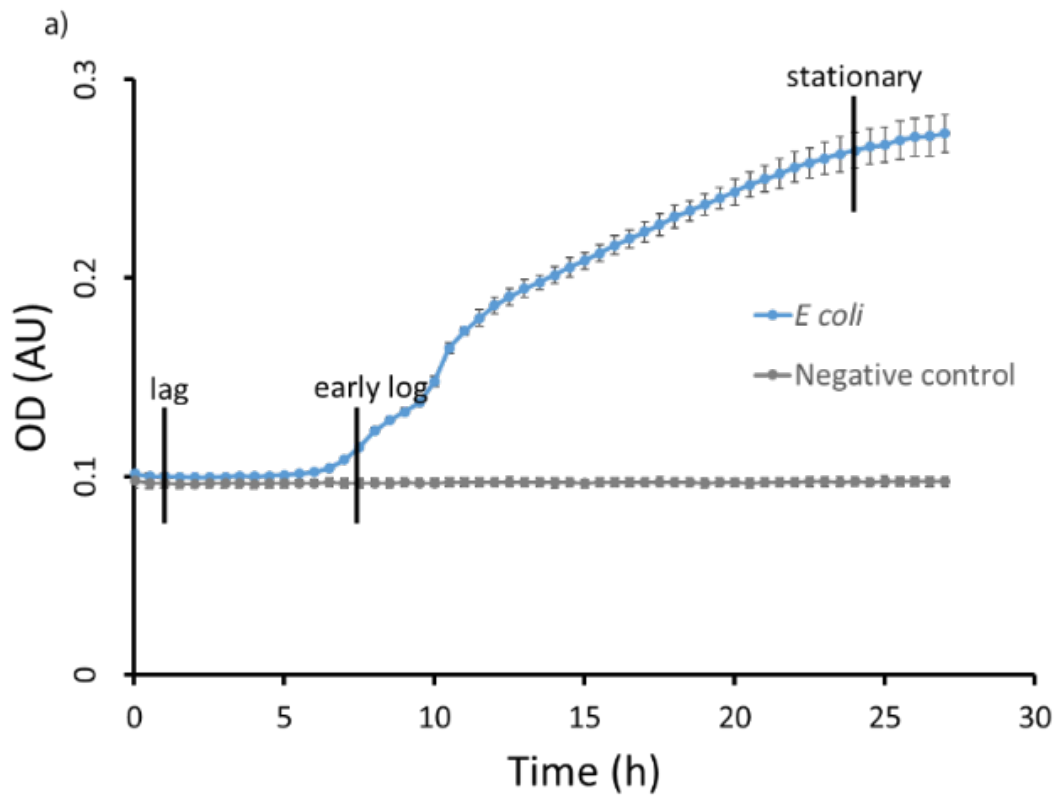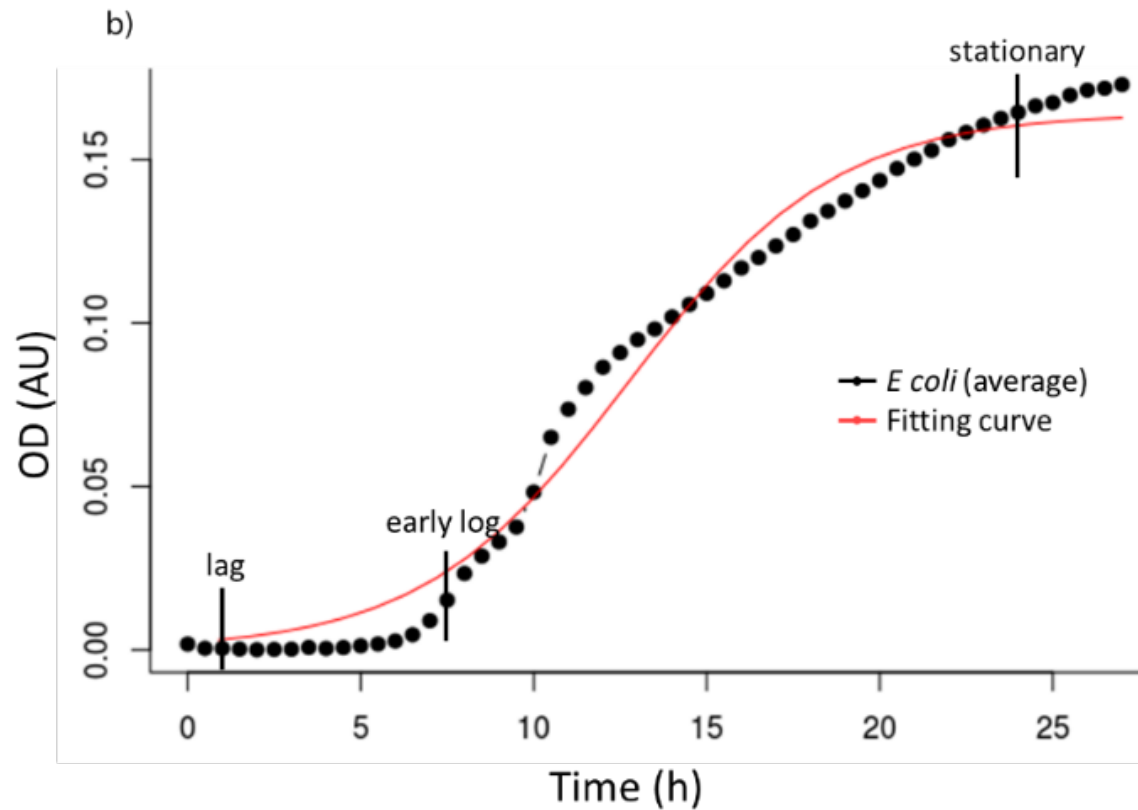

FL3-H

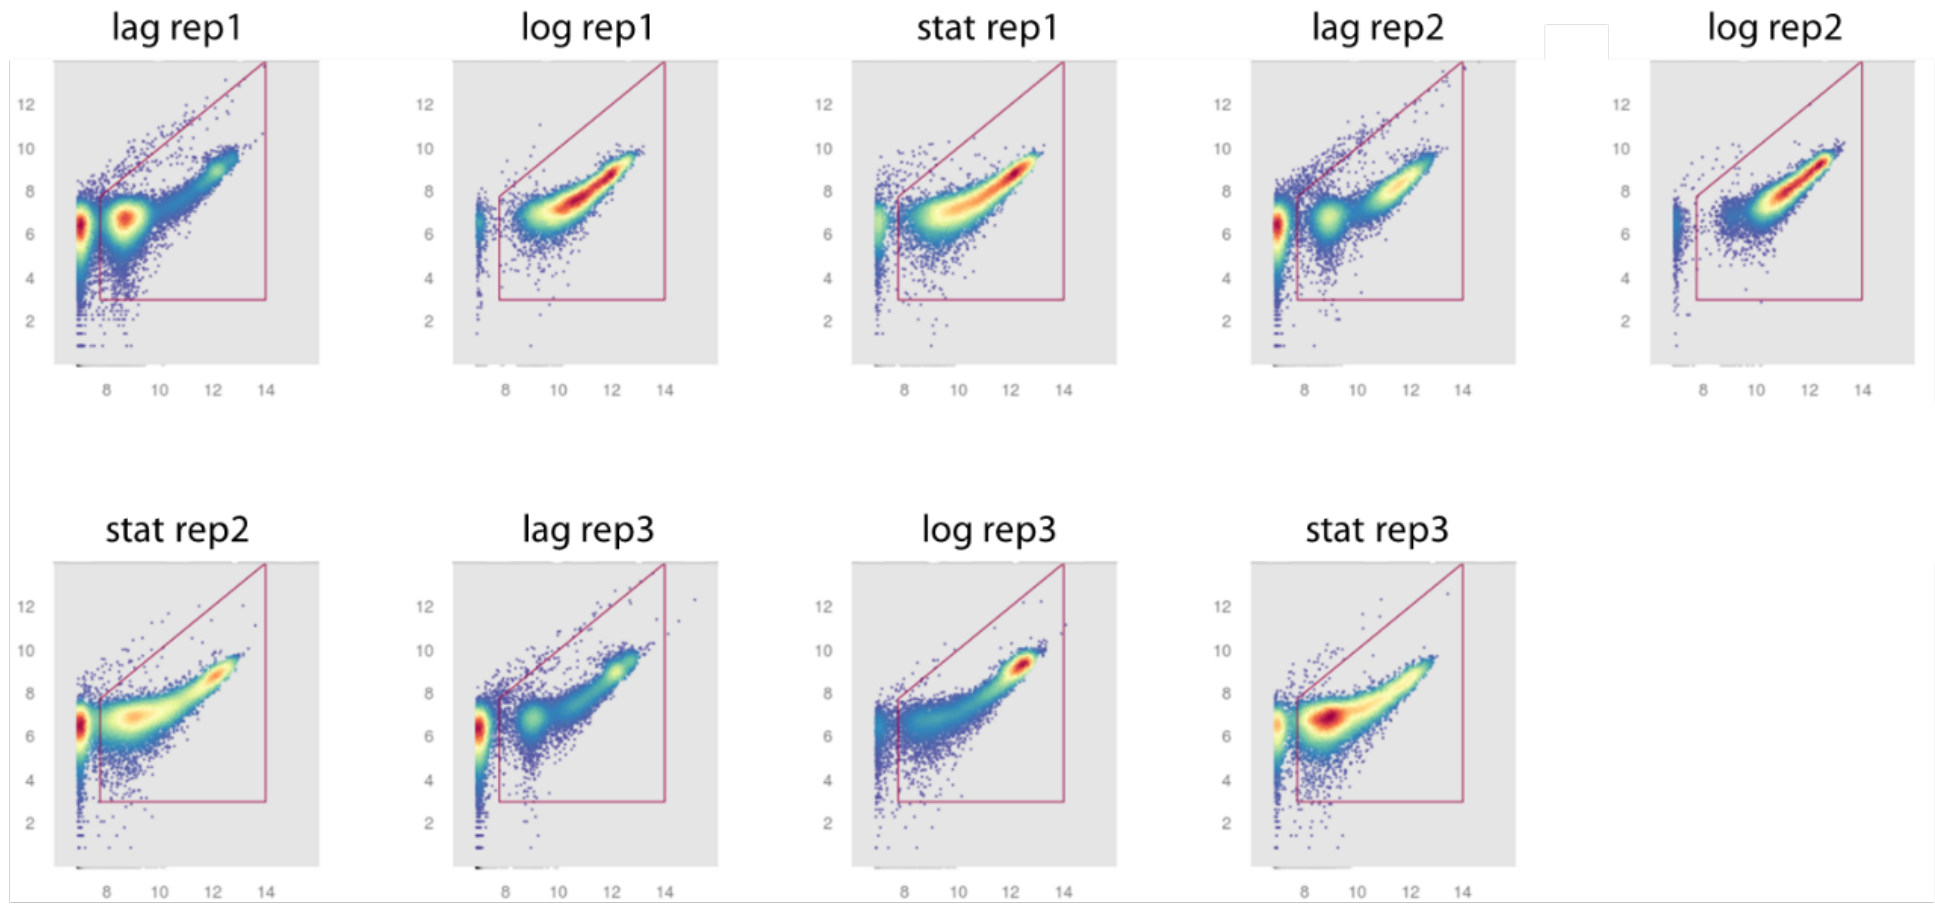

FL1-H

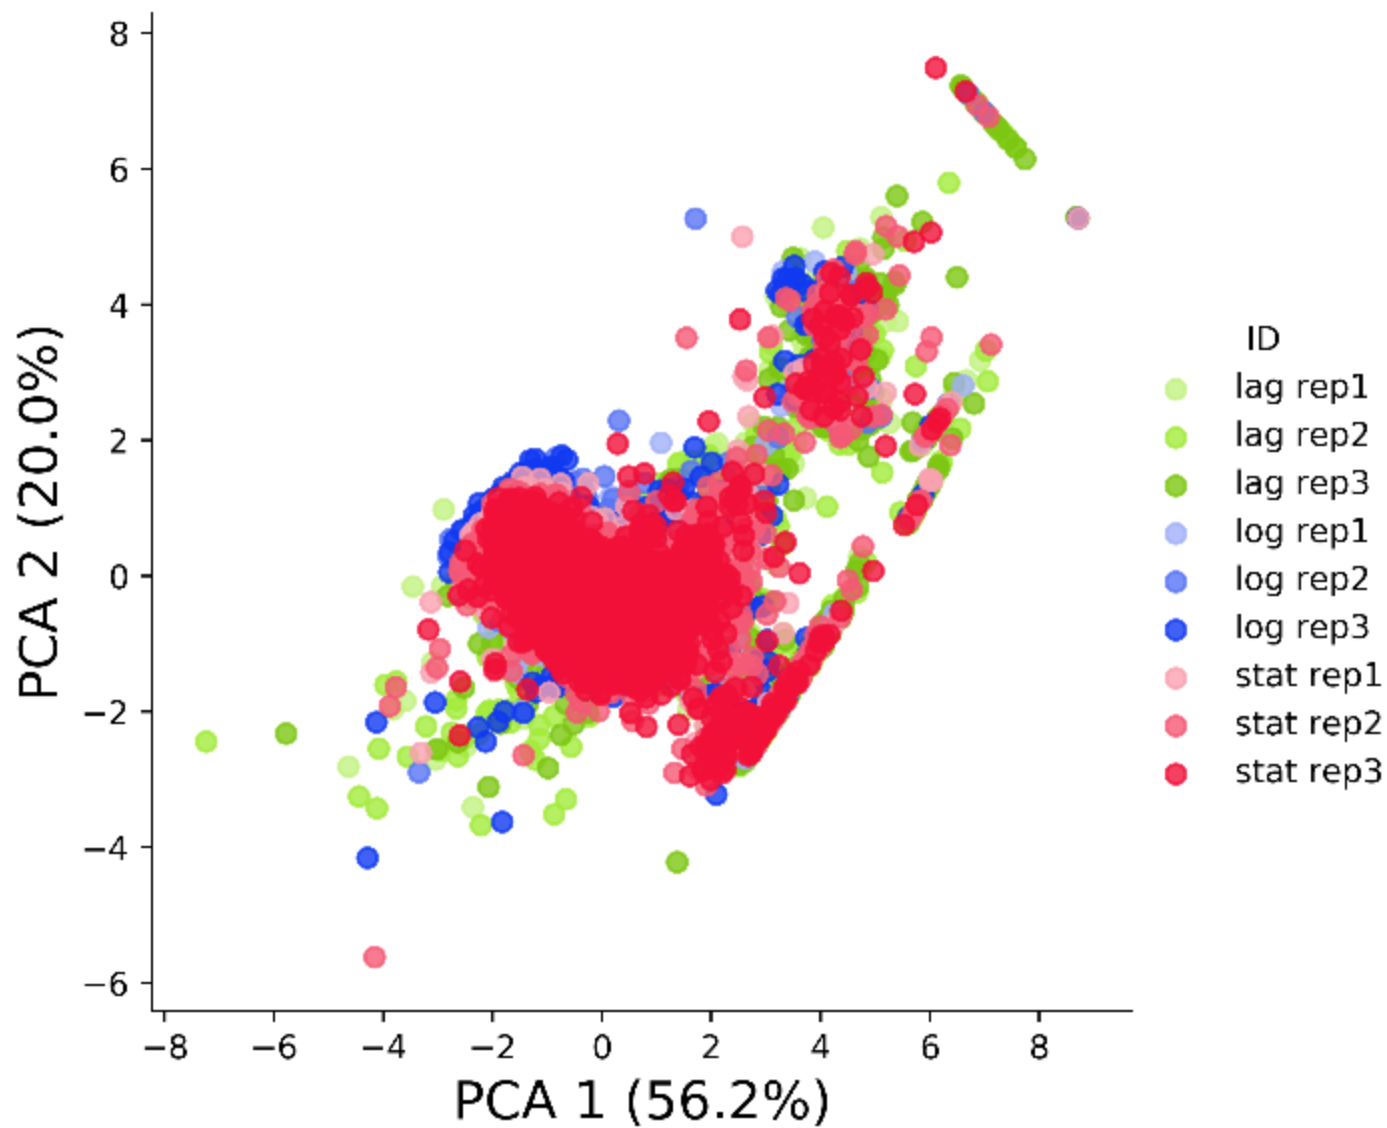

PCA 2 (14.2%)

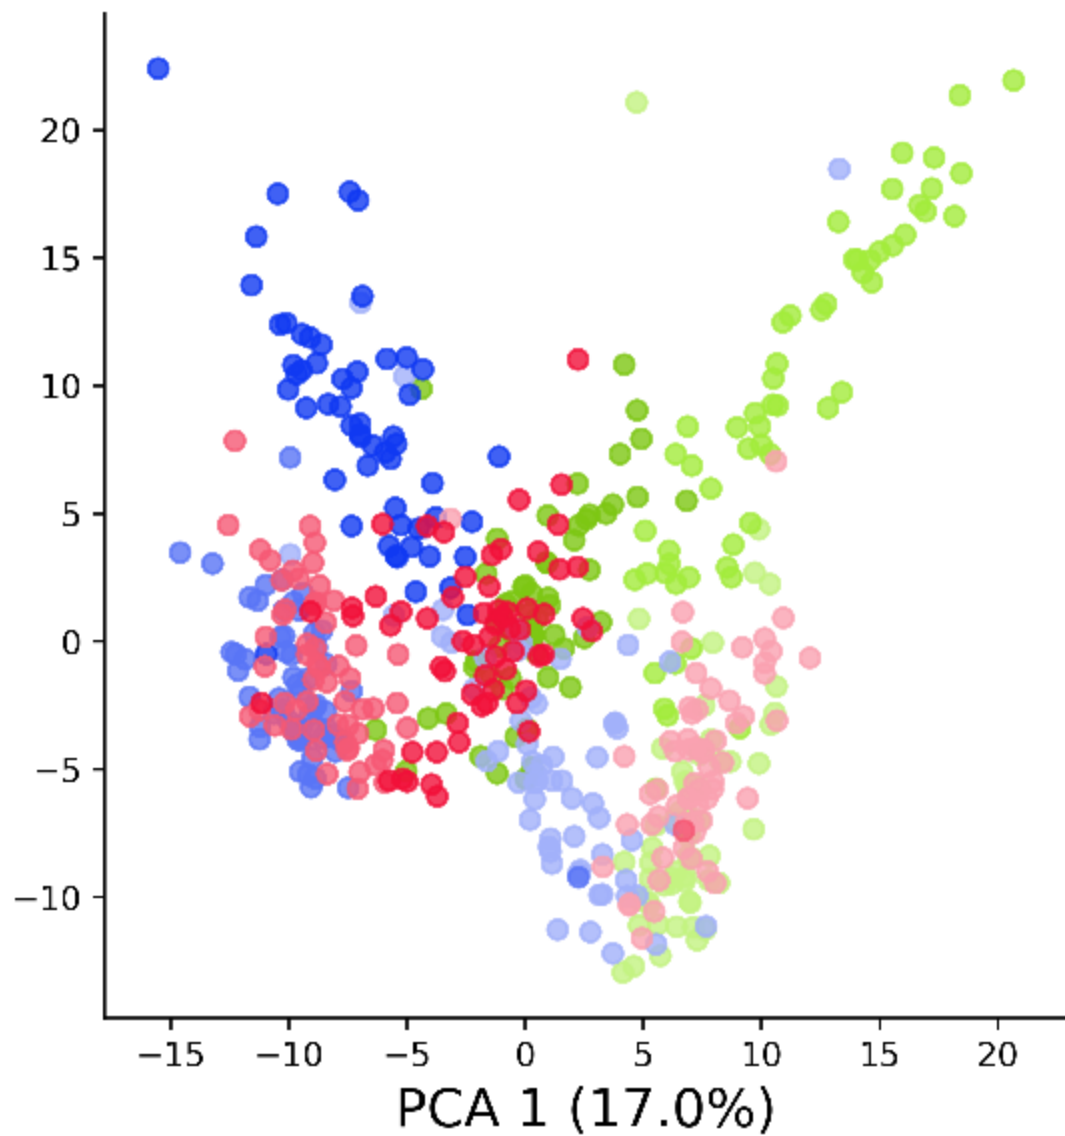

PCA 1 (17.0%)

- ID
- lag rep1
  - log rep1
  - stat rep1
  - lag rep2
  - log rep2
  - stat rep2
  - lag rep3
  - log rep3
  - stat rep3

a) k=15

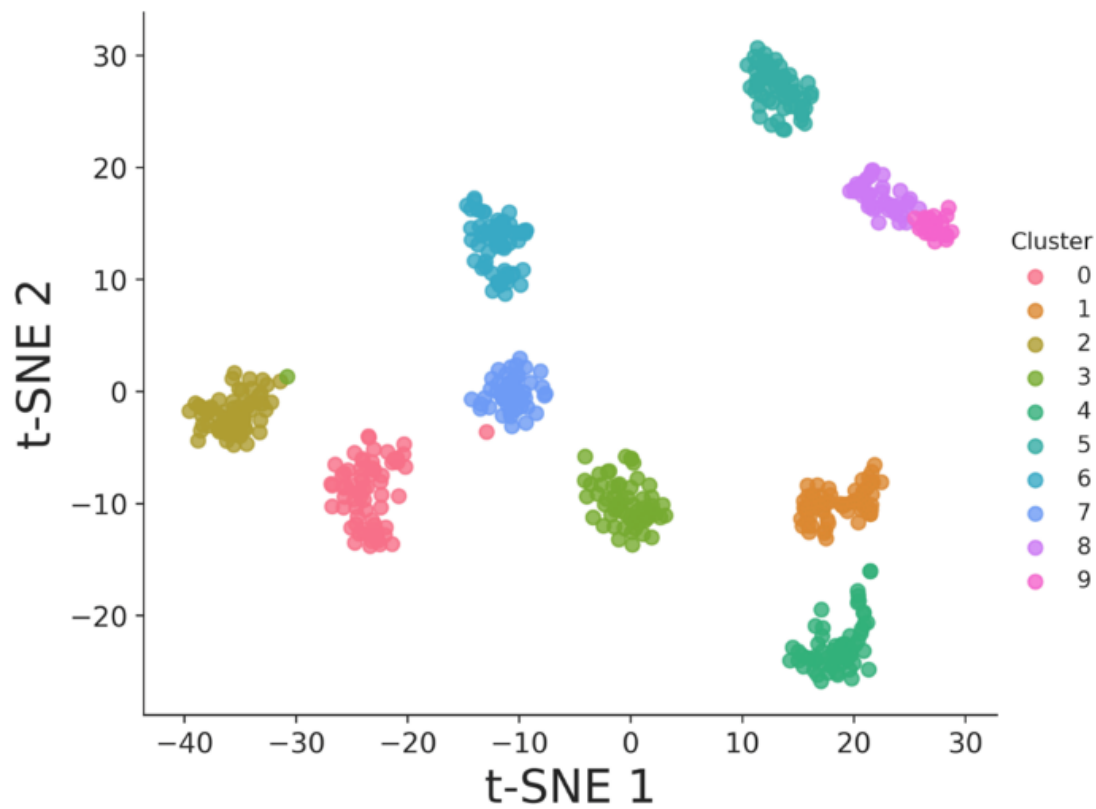

b) k=100

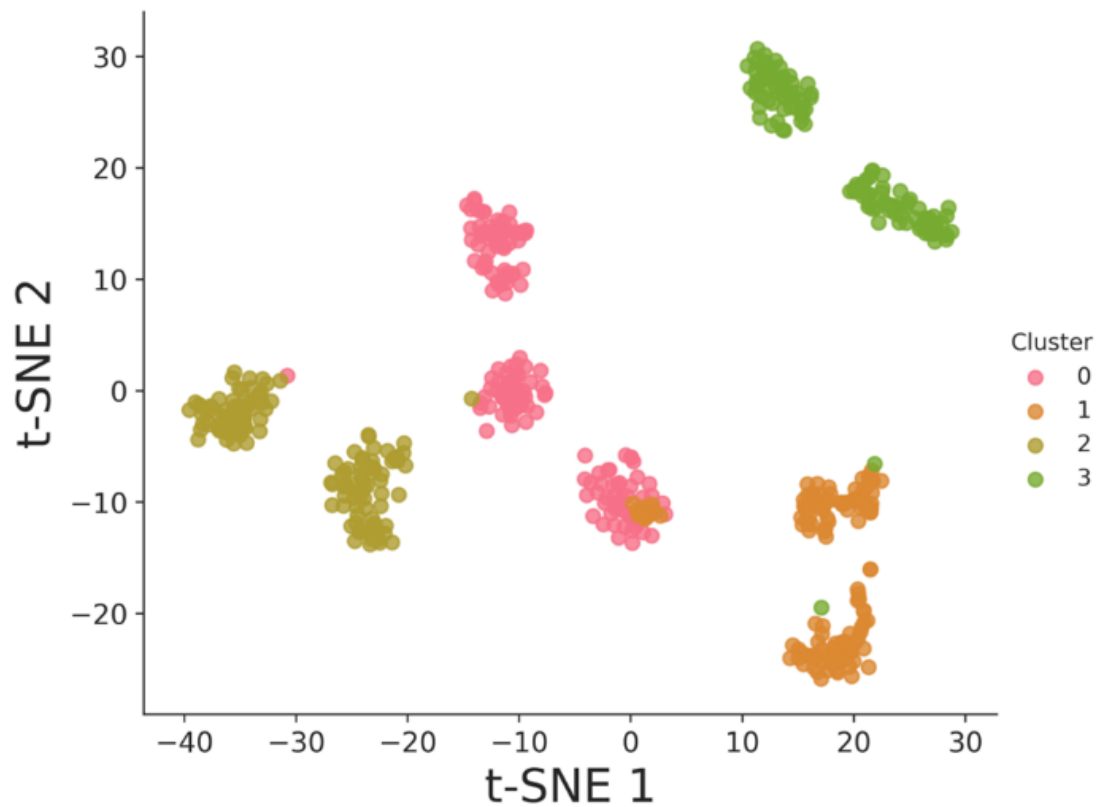

t-SNE observed groups

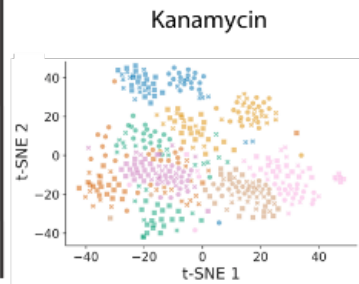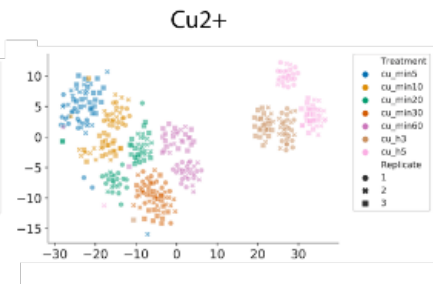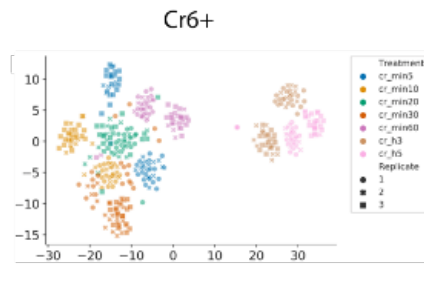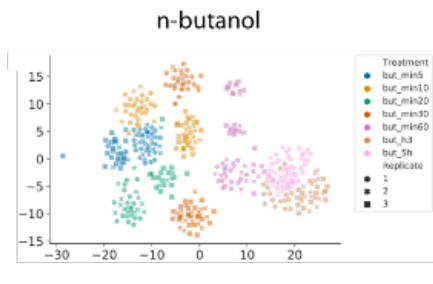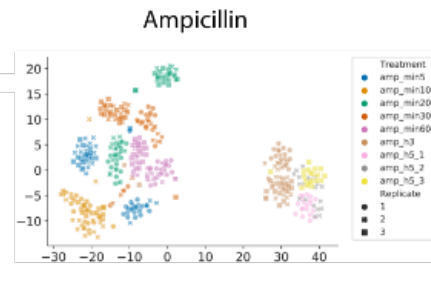

PhenoGraph optimal k

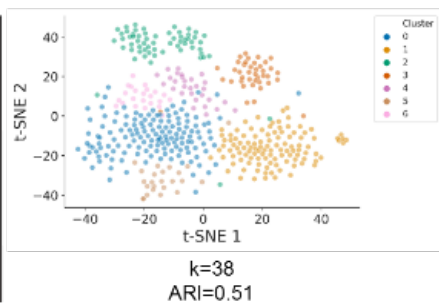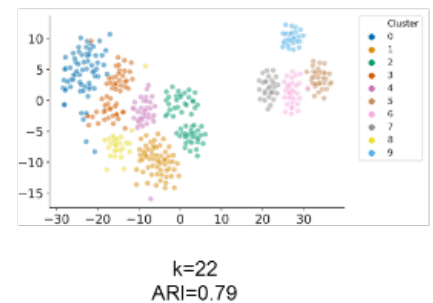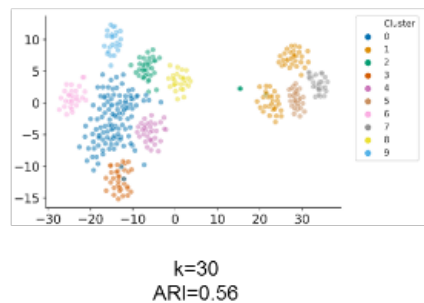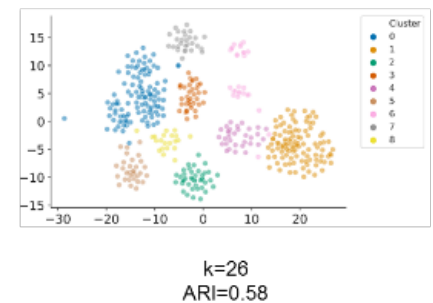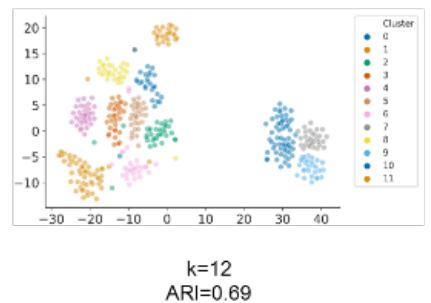

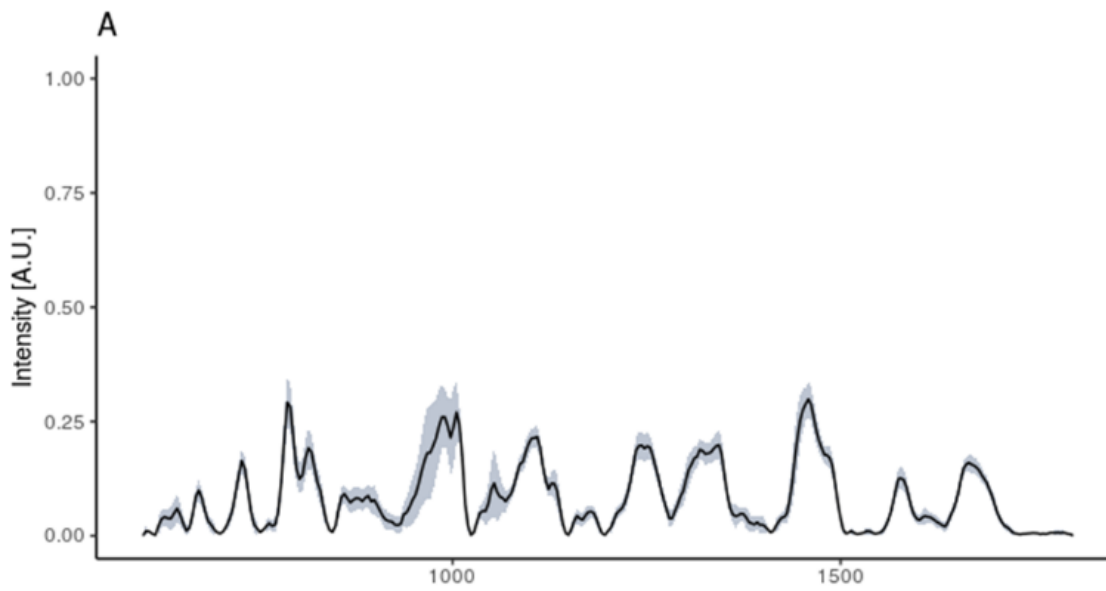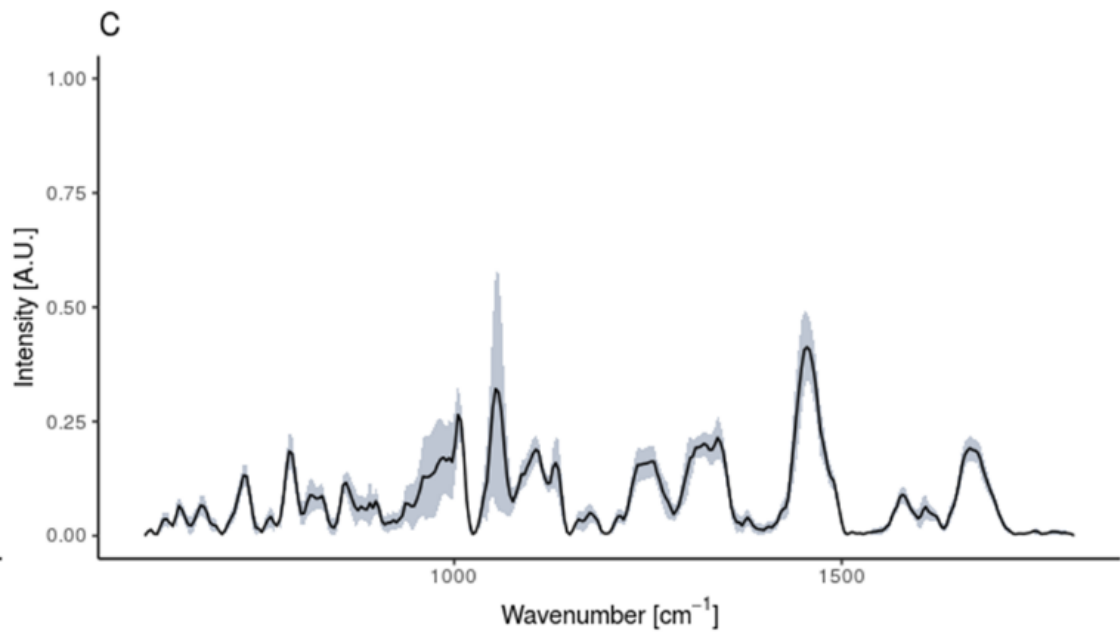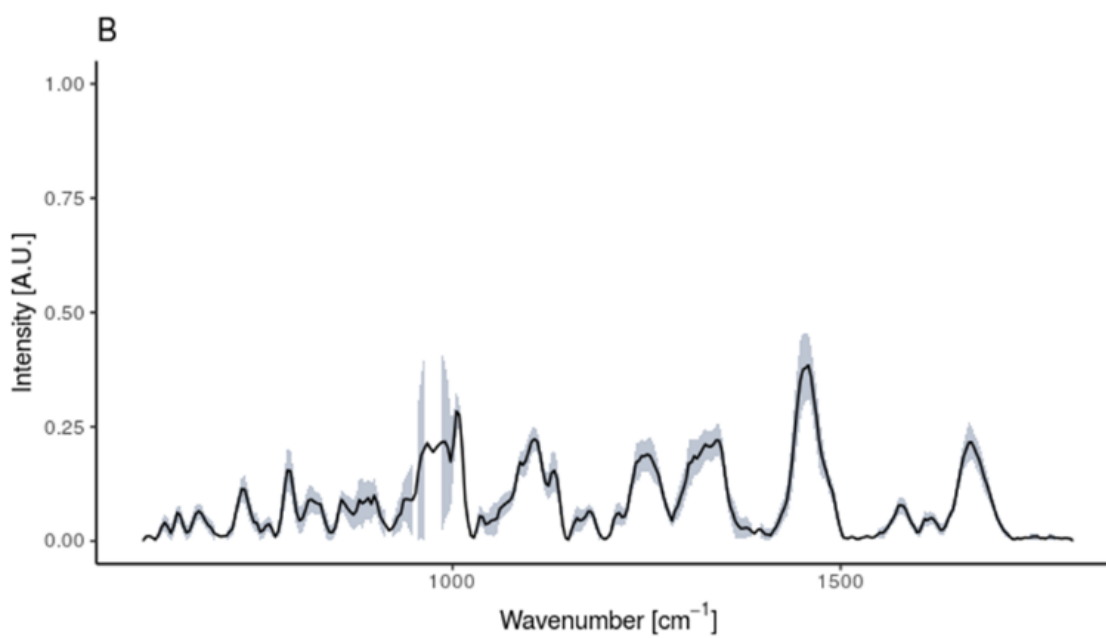

Source: http://biorxiv.org/content/10.1101/545681v3.full.pdf
